# Supplementary material for: Fe-MIL-101 modified by isatin-Schiff-base-Co: a heterogeneous catalyst for C–C, C–O, C–N, and C–P cross coupling reactions
Source: Royal Society of Chemistry journal article supplement (doi:10.1039/d1nj03468e), 2021-01-01
Supplement: d1nj03468e1.pdf [file d1nj03468e1.pdf]

## Fe-MIL-101 modified by isatin-Schiff-base-Co: A heterogeneous catalyst for the C-C, C-O, C-N, and C-P cross coupling reactions

Majid Rouzifar,<sup>a</sup> Sara Sobhani,<sup>\*a</sup> Alireza Farokhi Lashidani<sup>a</sup> and José Miguel Sansano<sup>b</sup>

### General information

FT-IR spectra were recorded by a JASCO FT-IR 460 plus spectrophotometer with a 400-4000  $\text{cm}^{-1}$  range using neat or KBr dispersed samples at room temperature. Thermogravimetric analysis (TGA) was performed using a Shimadzu thermogravimetric analyzer (TG-50) submitting the samples to a heating rate of 10  $^{\circ}\text{C}\cdot\text{min}^{-1}$  under atmospheric air. The surface area, pore volume and pore size distribution of the support and the catalyst were determined by  $\text{N}_2$  adsorption desorption using BELSORP mini II instrument. TEM analyses was performed with a TEM microscope (Philips CM30). The  $^1\text{H}$  NMR spectra were recorded in a Bruker Advance 300 and 400 MHz spectrometers using  $\text{CDCl}_3$  and  $\text{DMSO-d}_6$  and solvents containing tetramethylsilane as the internal standard. The coupling constants are given in Hz.

---

<sup>a</sup>. Address: Department of Chemistry, College of Sciences, University of Birjand, Birjand, Iran, email: [ssobhani@birjand.ac.ir](mailto:ssobhani@birjand.ac.ir), [sobhanisara@yahoo.com](mailto:sobhanisara@yahoo.com).

<sup>b</sup>. Departamento de Qu'ímica Org'ánica, Facultad de Ciencias, Centro de Innovaci'on en Qu'ímica Avanzada (ORFEO-CINQA) and Instituto de S'íntesis Org'ánica (ISO), Universidad de Alicante, Apdo. 99, 03080-Alicante, Spain.

## Table of contents

**Figure S1.** FT-IR spectra of (a) Fe-MIL-101-NH<sub>2</sub>, (b) Fe-MIL-101-isatin-Schiff base and (c) Fe-MIL-101-isatin-Schiff-base-Co

**Figure S2.** N<sub>2</sub> adsorption-desorption of (a) Fe-MIL-101-NH<sub>2</sub> and (b) Fe-MIL-101-isatin-Schiff-base-Co

**Figure S3.** TGA curves of (a) Fe-MIL-101-NH<sub>2</sub> and (b) Fe-MIL-101-isatin-Schiff-base-Co

**Figure S4.** Ullmann-type reaction between iodobenzene and phenol using Fe-MIL-101-isatin-Schiff-base-Co as catalyst in DMF: (a) normal reaction, (b) using a hot filtration protocol and (c) employing a poison for the catalyst

**Figure S5.** Reusability of the Fe-MIL-101-isatin-Schiff-base-Co during the Ullmann-type coupling reaction of iodobenzene with phenol in

**Figure S6.** (a) FT-IR and (b) TEM image of the Fe-MIL-101-isatin-Schiff-base-Co after five times reuse in the Ullmann-type coupling reaction of iodobenzene with phenol in 4 h

**Figure S7.** Reusability of the Fe-MIL-101-isatin-Schiff-base-Co in Buchwald-Hartwig (4.5 h), Hirao (6 h), Hiyama (1 h) and Mizoroki-Heck (2 h) reactions

**Figure S8.** <sup>1</sup>H NMR and <sup>13</sup>C NMR spectra of oxydibenzene

**Figure S9.** <sup>1</sup>H NMR and <sup>13</sup>C NMR spectra of 1-methoxy-4-phenoxybenzene

**Figure S10.** <sup>1</sup>H NMR and <sup>13</sup>C NMR spectra of 1-nitro-4-phenoxybenzene

**Figure S11.** <sup>1</sup>H NMR and <sup>13</sup>C NMR spectra of 2-(*tert*-butyl)-4-methyl-1-(4-nitrophenoxy) benzene

**Figure S12.** <sup>1</sup>H NMR and <sup>13</sup>C NMR spectra of 4-(4-nitrophenoxy) benzaldehyde

**Figure S13.** <sup>1</sup>H NMR and <sup>13</sup>C NMR spectra of 1-(4-nitrophenoxy) naphthalene

**Figure S14.** <sup>1</sup>H NMR and <sup>13</sup>C NMR spectra of diphenylamine

**Figure S15.** <sup>1</sup>H NMR and <sup>13</sup>C NMR spectra of 4-chloro-N-(4-methoxyphenyl) aniline

**Figure S16.** <sup>1</sup>H NMR and <sup>13</sup>C NMR spectra of 2-aminodiphenylamine

**Figure S17.** <sup>1</sup>H NMR and <sup>13</sup>C NMR spectra of 4-sulfodiphenylamine

**Figure S18.** <sup>1</sup>H NMR and <sup>13</sup>C NMR spectra of 1-(4-nitrophenyl)-1H-pyrazole

**Figure S19.**  $^1\text{H}$  NMR and  $^{13}\text{C}$  NMR spectra of 1-(4-Nitrophenyl)-1H-imidazole

**Figure S20.**  $^1\text{H}$  NMR and  $^{13}\text{C}$  NMR spectra of 1,4-bis(4-nitrophenyl) piperazine

**Figure S21.**  $^1\text{H}$  NMR and  $^{13}\text{C}$  NMR spectra of diethylphenylphosphonate

**Figure S22.**  $^1\text{H}$  NMR and  $^{13}\text{C}$  NMR spectra of diethyl 4-chlorophenylphosphonate

**Figure S23.**  $^1\text{H}$  NMR and  $^{13}\text{C}$  NMR spectra of diethyl 4-iodophenylphosphonate

**Figure S24.**  $^1\text{H}$  NMR and  $^{13}\text{C}$  NMR spectra of diethyl 4-methoxyphenylphosphonate

**Figure S25.**  $^1\text{H}$  NMR and  $^{13}\text{C}$  NMR spectra of diethyl (4-nitrophenyl) phosphonate

**Figure S26.**  $^1\text{H}$  NMR and  $^{13}\text{C}$  NMR spectra of diethyl 4-bromophenylphosphonate

**Figure S27.**  $^1\text{H}$  NMR and  $^{13}\text{C}$  NMR spectra of diethyl 4-tolylphosphonate

**Figure S28.**  $^1\text{H}$  NMR and  $^{13}\text{C}$  NMR spectra of tetraethylphenylbis (phosphonate)

**Figure S29.**  $^1\text{H}$  NMR and  $^{13}\text{C}$  NMR spectra of biphenyl

**Figure S30.**  $^1\text{H}$  NMR and  $^{13}\text{C}$  NMR spectra of 4-methoxybiphenyl

**Figure S31.**  $^1\text{H}$  NMR and  $^{13}\text{C}$  NMR spectra of 4-chlorobiphenyl

**Figure S32.**  $^1\text{H}$  NMR and  $^{13}\text{C}$  NMR spectra of 4-nitrobiphenyl

**Figure S33.**  $^1\text{H}$  NMR and  $^{13}\text{C}$  NMR spectra of 4-cyanobiphenyl

**Figure S34.**  $^1\text{H}$  NMR and  $^{13}\text{C}$  NMR spectra of 4-iodo-1, 1'-biphenyl

**Figure S35.**  $^1\text{H}$  NMR and  $^{13}\text{C}$  NMR spectra of (*E*)-*n*-butyl cinnamate

**Figure S36.**  $^1\text{H}$  NMR and  $^{13}\text{C}$  NMR spectra of (*E*)-methyl cinnamate

**Figure S37.**  $^1\text{H}$  NMR and  $^{13}\text{C}$  NMR spectra of (*E*)-ethyl cinnamate

**Figure S38.**  $^1\text{H}$  NMR and  $^{13}\text{C}$  NMR spectra of (*E*)-methyl 2-methyl-3-phenylacrylate

**Figure S39.**  $^1\text{H}$  NMR and  $^{13}\text{C}$  NMR spectra of (*E*)-*n*-butyl 3-(4-methoxyphenyl) acrylate

**Figure S40.**  $^1\text{H}$  NMR and  $^{13}\text{C}$  NMR spectra of (*E*)-*n*-butyl 3-(4-chlorophenyl) acrylate

**Figure S41.**  $^1\text{H}$  NMR and  $^{13}\text{C}$  NMR spectra of (*E*)-*n*-butyl 3-(4-nitrophenyl) acrylate

**Figure S42.**  $^1\text{H}$  NMR and  $^{13}\text{C}$  NMR spectra of (*E*)-*n*-butyl 3-(4-cyanophenyl) acrylate

**Figure S43.**  $^1\text{H}$  NMR and  $^{13}\text{C}$  NMR spectra of (*E*)-1,2-diphenylethene

**Figure S44.**  $^1\text{H}$  NMR and  $^{13}\text{C}$  NMR spectra of (*E*)-1-methoxy-4-styrylbenzene

**Figure S45.**  $^1\text{H}$  NMR and  $^{13}\text{C}$  NMR spectra of (*E*)-1-nitro-4-styrylbenzene

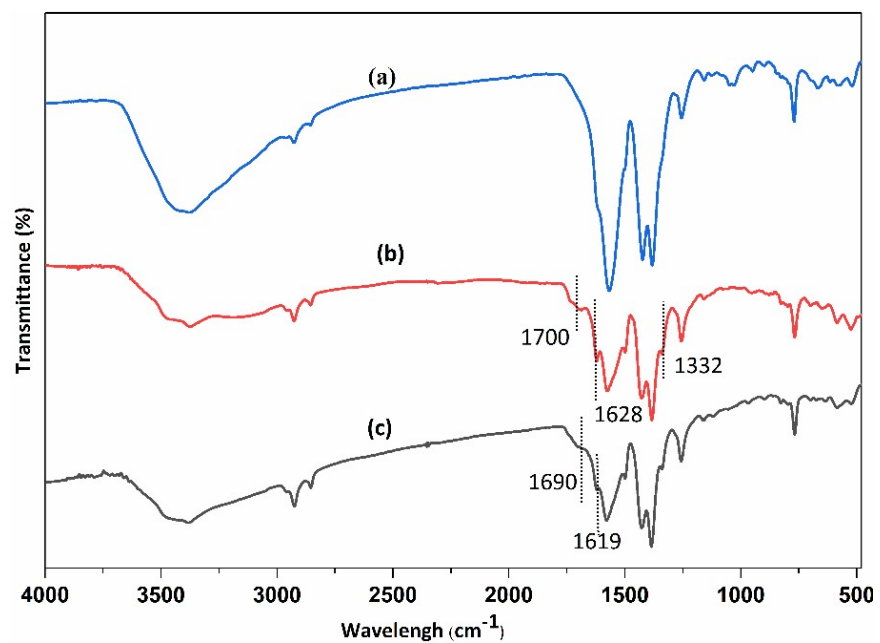

**Figure S1.** FT-IR spectra of (a) Fe-MIL-101-NH<sub>2</sub>, (b) Fe-MIL-101-isatin-Schiff base and (c) Fe-MIL-101-isatin-Schiff-base-Co.

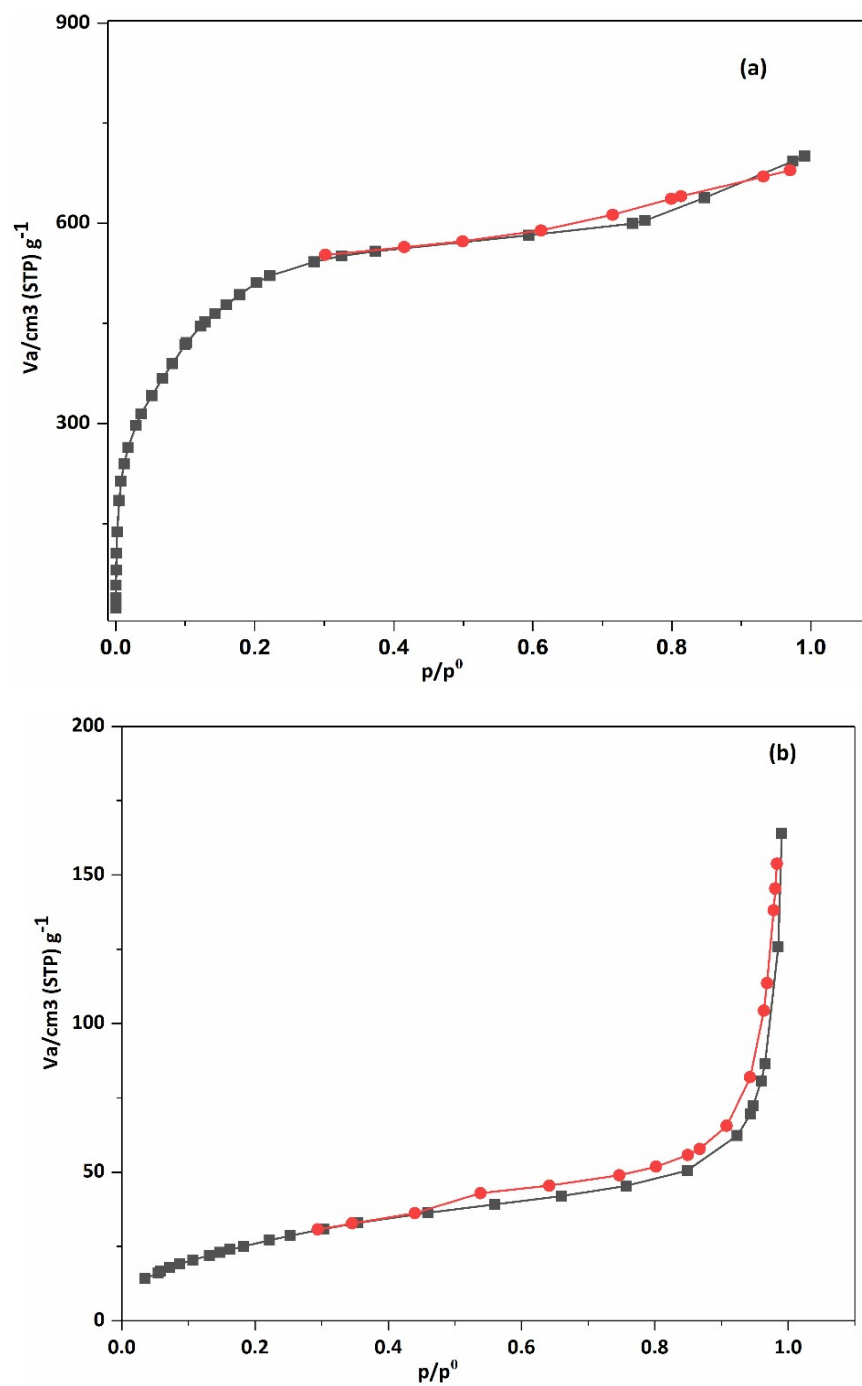

**Figure S2.** N<sub>2</sub> adsorption-desorption of (a) Fe-MIL-101-NH<sub>2</sub> and (b) Fe-MIL-101-isatin-Schiff-base-Co

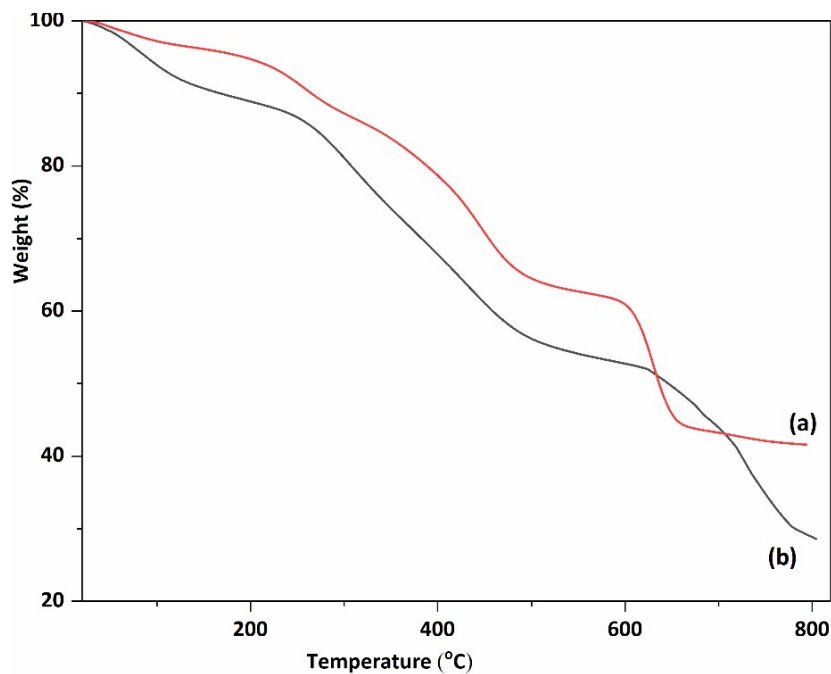

**Figure S3.** TGA curves of (a) Fe-MIL-101-NH<sub>2</sub> and (b) Fe-MIL-101-isatin-Schiff-base-Co.

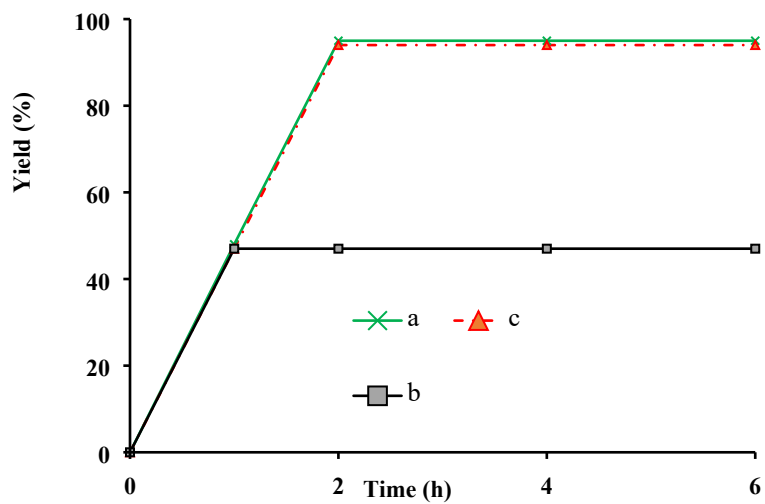

**Figure S4.** Ullmann-type reaction between iodobenzene and phenol using Fe-MIL-101-isatin-Schiff-base-Co as catalyst in DMF: (a) normal reaction, (b) using a hot filtration protocol and (c) employing a poison for the catalyst.

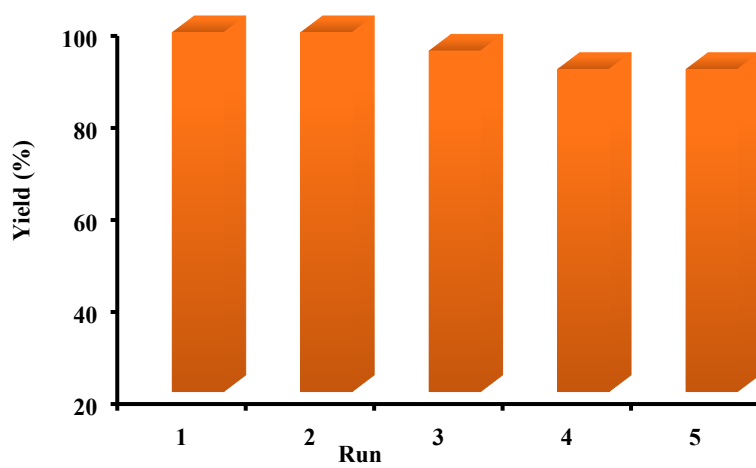

**Figure S5.** Reusability of the Fe-MIL-101-isatin-Schiff-base-Co during the Ullmann-type coupling reaction of iodobenzene with phenol in 4 h.

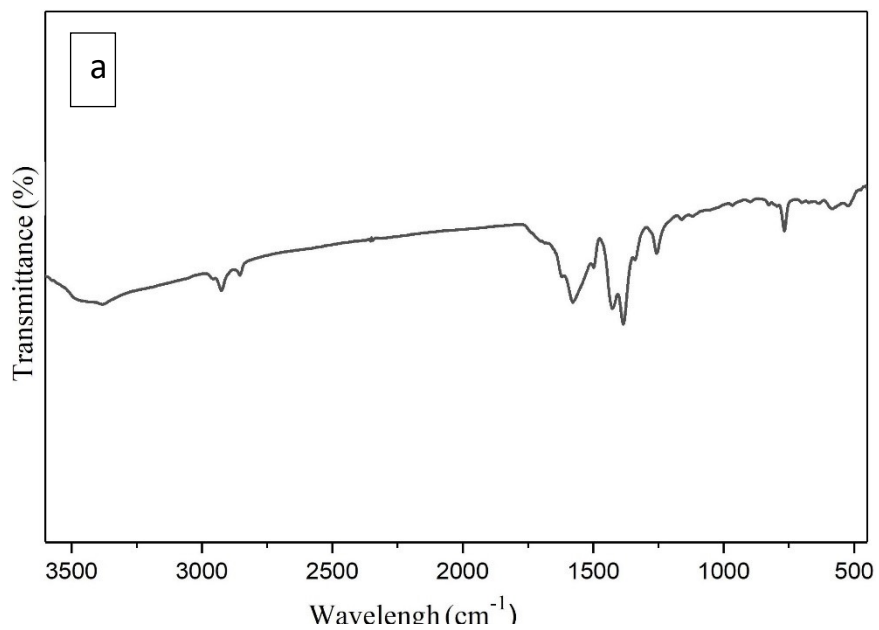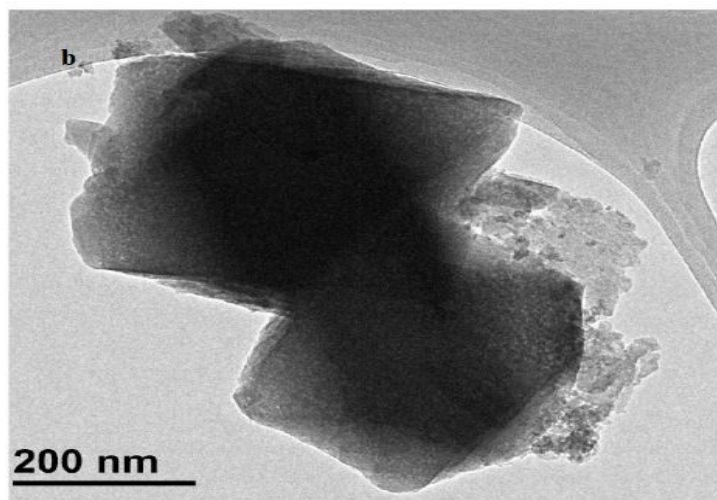

**Figure S6.** (a) FT-IR and (b) TEM image of the Fe-MIL-101-isatin-Schiff-base-Co after five times reuse in the Ullmann-type coupling reaction of iodobenzene with phenol in 4 h.



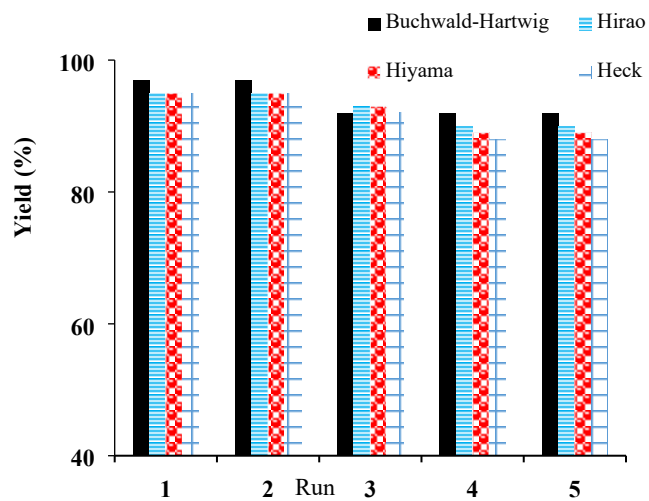

**Figure S7.** Reusability of the Fe-MIL-101-isatin-Schiff-base-Co in Buchwald-Hartwig (4.5 h), Hiraio (6 h), Hiyama (1 h) and Mizoroki-Heck (2 h) reactions.

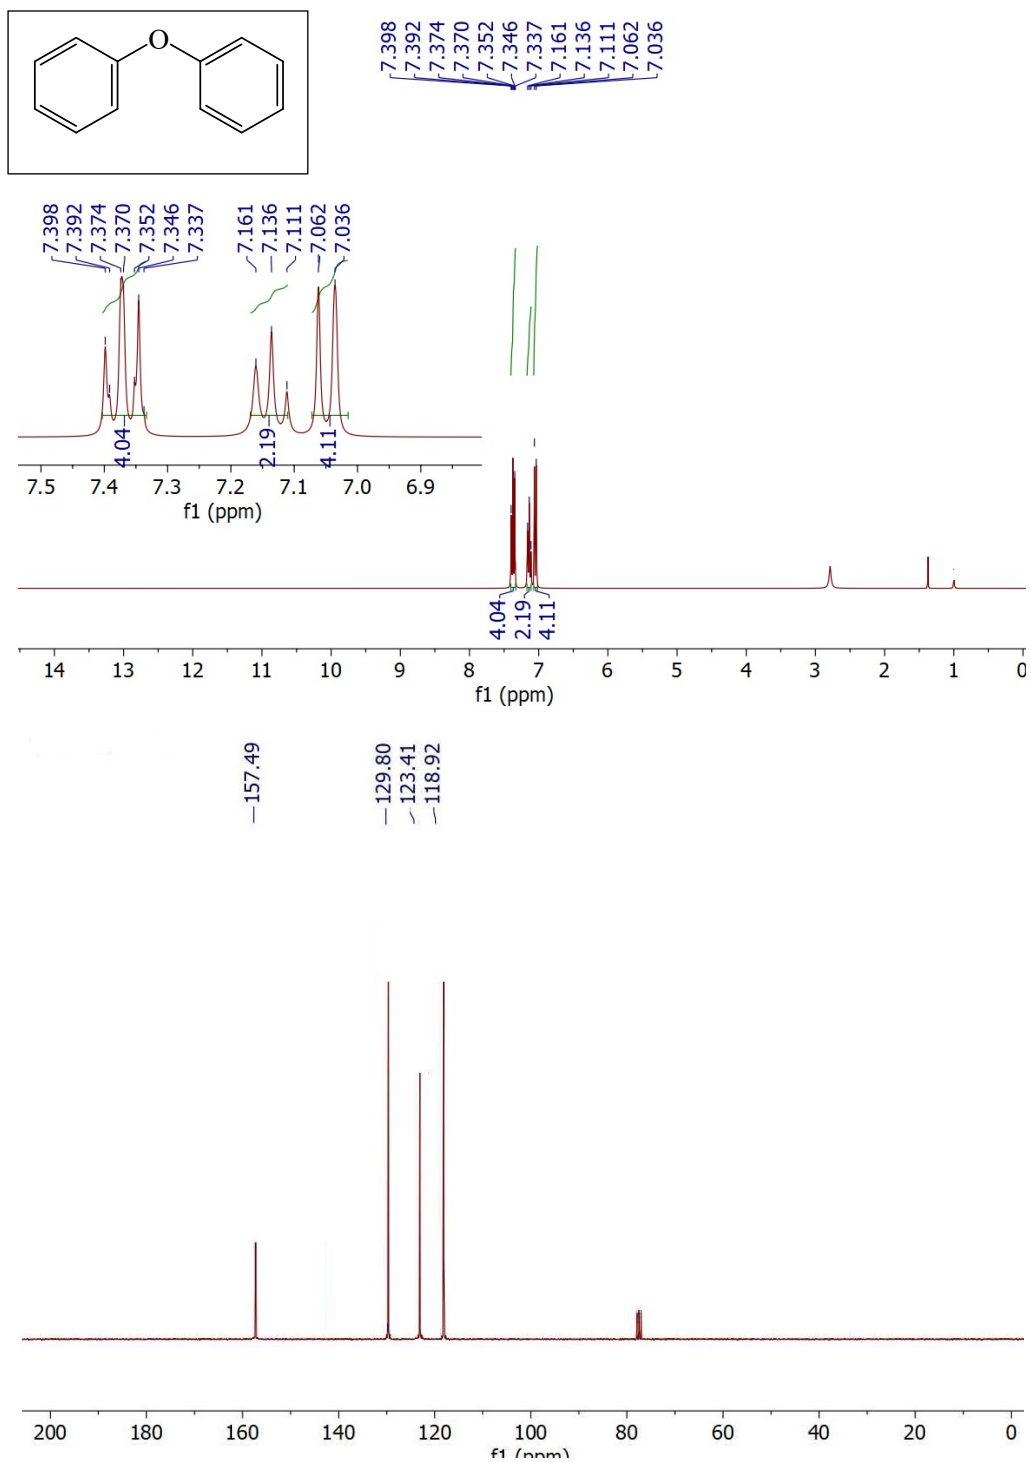

**Figure S8.** <sup>1</sup>H NMR and <sup>13</sup>C NMR spectra of oxydibenzene

<sup>1</sup>H NMR (300 MHz, CDCl<sub>3</sub>): δ 7.34-7.39 (m, 4 H), 7.13 (t, 2 H, *J* = 7.2 Hz), 7.04 (d, 4 H, *J* = 7.8 Hz) ppm, <sup>13</sup>C NMR (75 MHz, CDCl<sub>3</sub>), δ 157.4, 129.8, 123.4, 118.9 ppm (Table 1, entries 1, 3, 8 and 12).

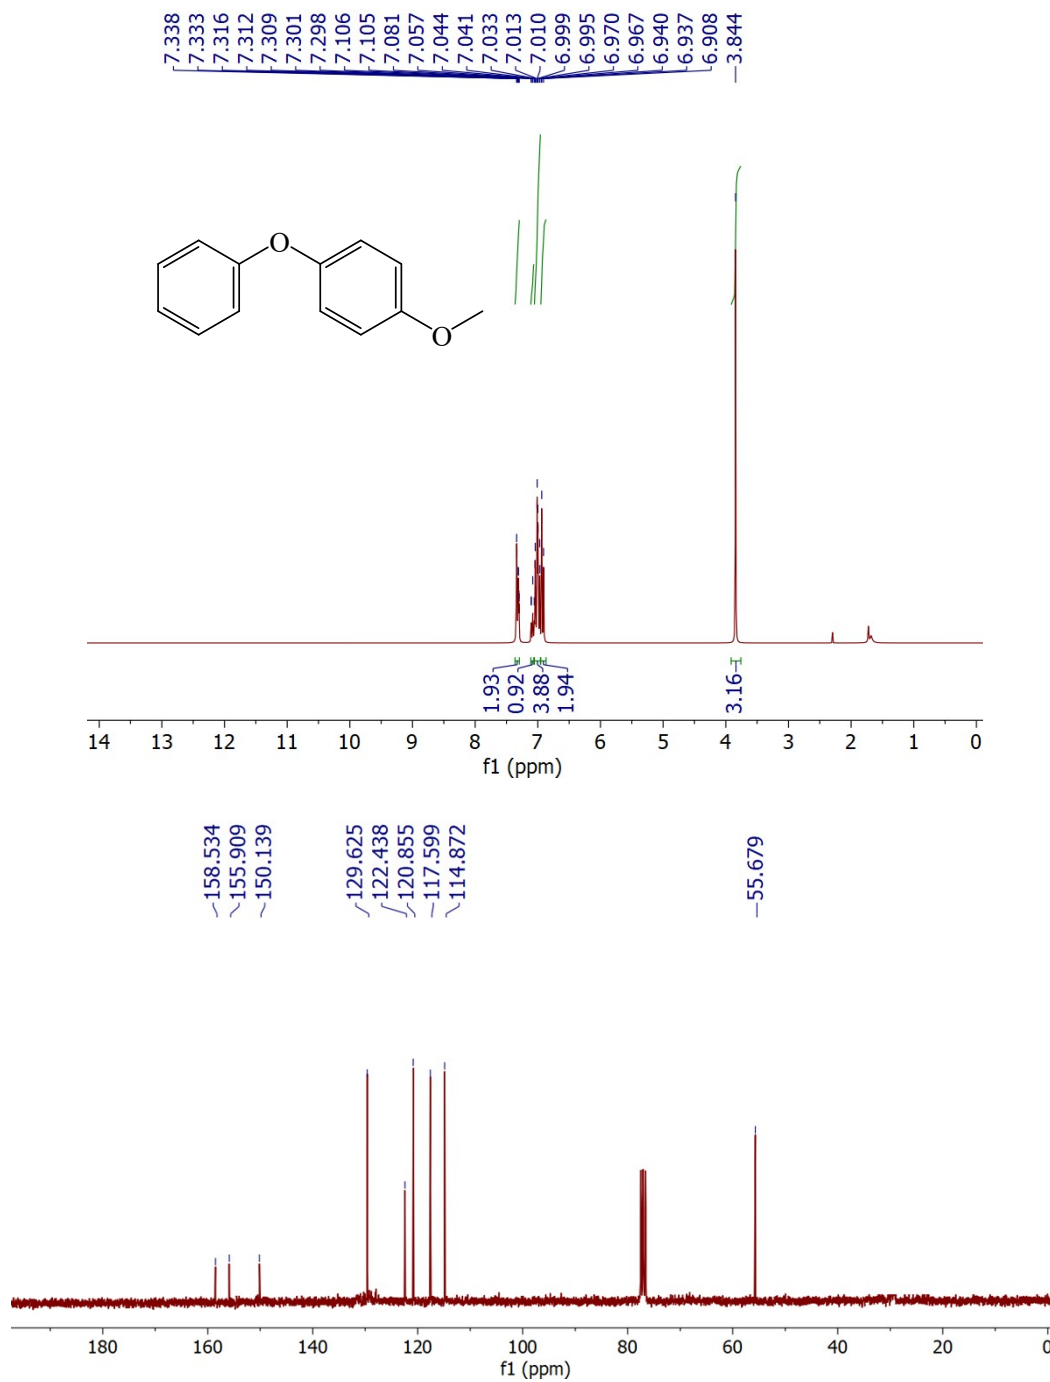

**Figure S9.** <sup>1</sup>H NMR and <sup>13</sup>C NMR spectra of 1-methoxy-4-phenoxybenzene

<sup>1</sup>H NMR (300 MHz, CDCl<sub>3</sub>): δ 7.29-7.33 (m, 2 H), 7.04-7.10 (m, 1 H), 6.90-6.94 (m, 2 H), 6.96-7.01 (m, 4 H), 3.84 (s, 3 H) ppm. <sup>13</sup>C NMR (75 MHz, CDCl<sub>3</sub>), δ 158.4, 155.9, 150.1, 129.6, 122.4, 120.8, 117.5, 114.8, 55.6 ppm (Table 1, entries 2 and 4).

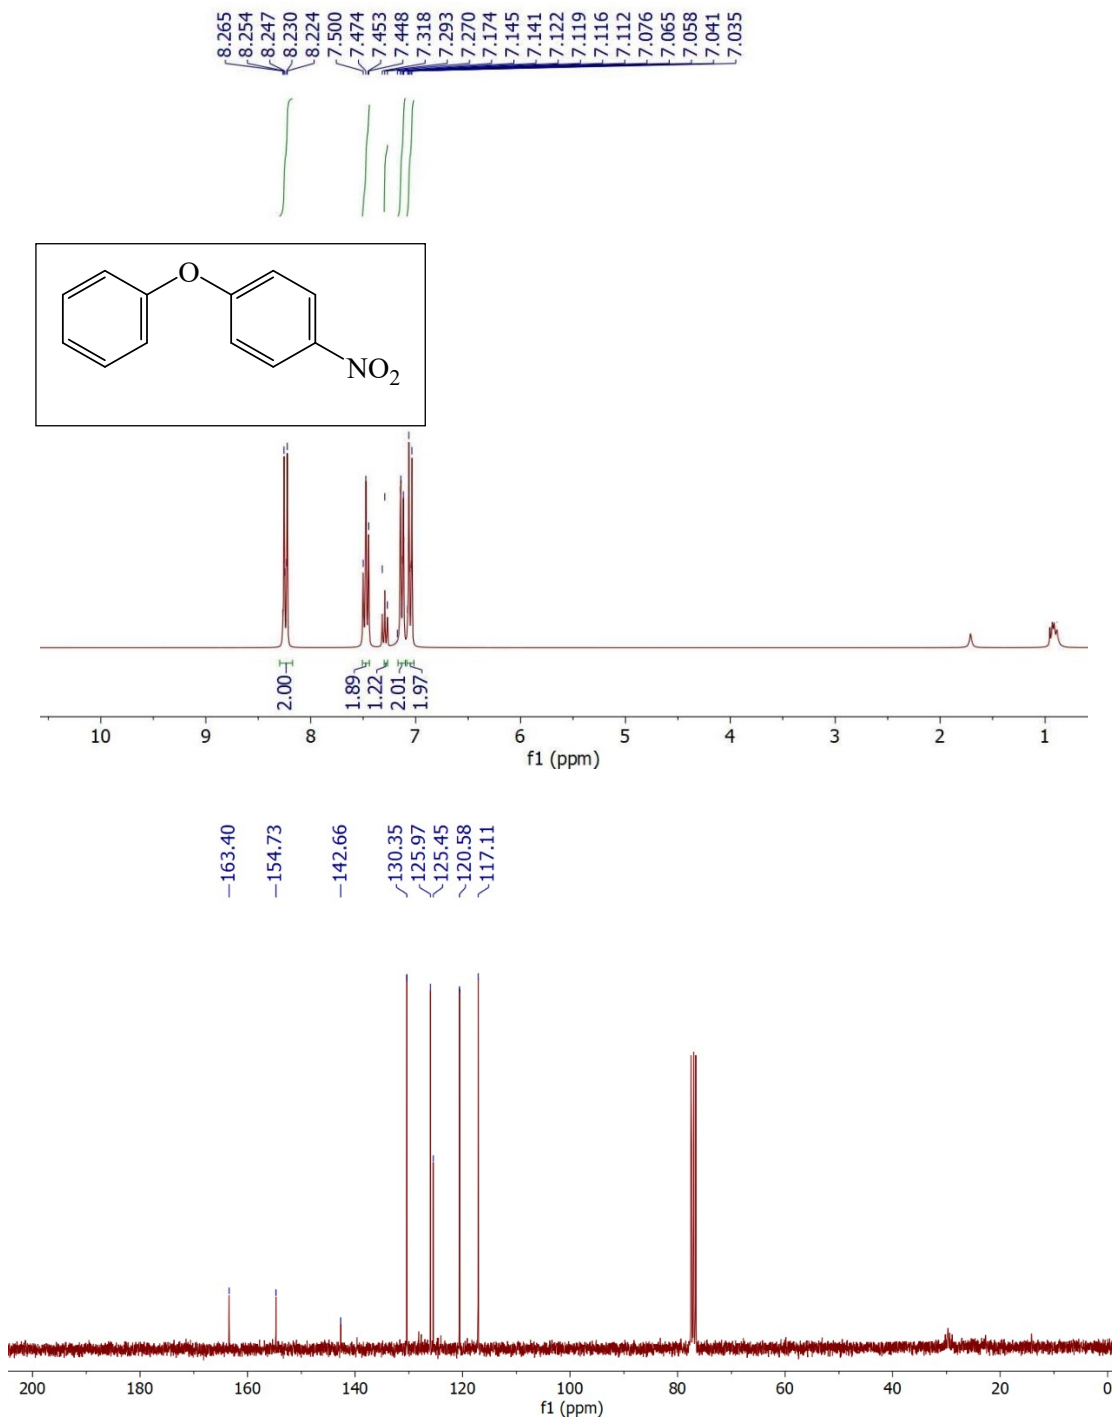

**Figure S10.** <sup>1</sup>H NMR and <sup>13</sup>C NMR spectra of 1-nitro-4-phenoxybenzene

<sup>1</sup>H NMR (CDCl<sub>3</sub>, 300 MHz): δ 8.23 (d, 2 H, *J* = 9 Hz), 7.47 (t, 2 H, *J* = 7.8 Hz), 7.29 (t, 1 H, *J* = 7.5 Hz), 7.13 (d, 2 H, *J* = 7.5 Hz), 7.05 (d, 2 H, *J* = 9 Hz) ppm. <sup>13</sup>C NMR (75 MHz, CDCl<sub>3</sub>), δ 163.4, 154.7, 142.6, 130.3, 125.9, 125.4, 120.5, 117.1 ppm (Table 1, entries 5 and 9).

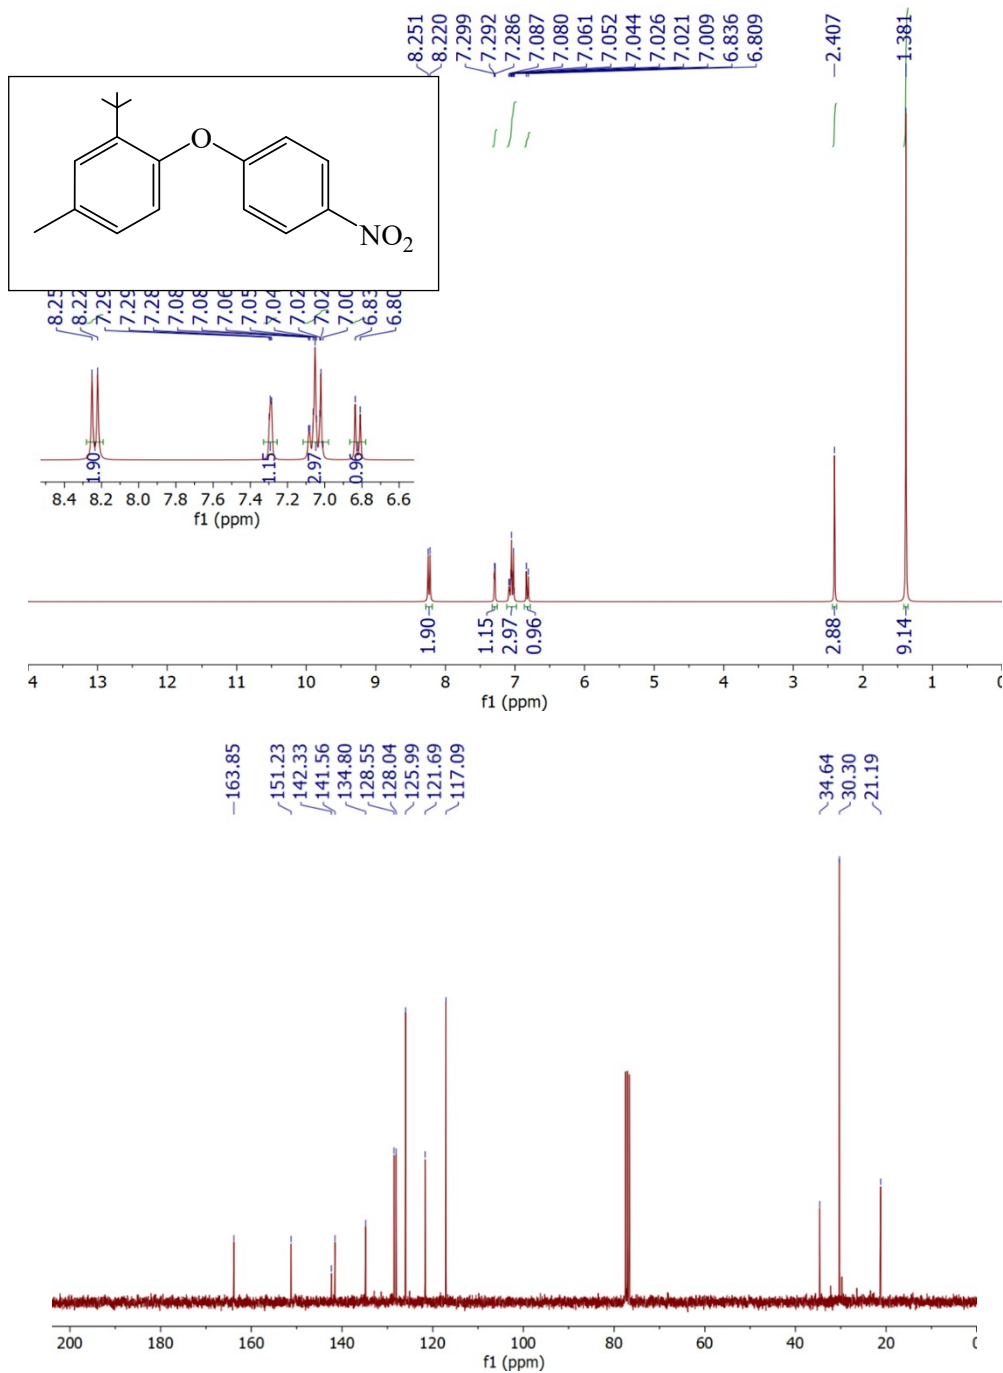

**Figure S11.** <sup>1</sup>H NMR and <sup>13</sup>C NMR spectra of 2-(*tert*-butyl)-4-methyl-1-(4-nitrophenoxy)benzene

<sup>1</sup>H NMR (CDCl<sub>3</sub>, 300 MHz): δ 8.24 (d, 2 H, *J* = 9.3 Hz), 7.28-7.29 (m, 1 H), 7.02-7.08 (m, 3 H), 6.82 (d, 1 H, *J* = 7.5 Hz), 2.40 (s, 3 H), 1.38 (s, 9 H) ppm. <sup>13</sup>C NMR (75 MHz, CDCl<sub>3</sub>), δ 163.8, 151.2, 142.3, 141.5, 134.8, 128.5, 128.0, 125.9, 121.6, 117.0, 34.6, 30.3, 21.1 ppm (Table 1, entries 7 and 11).

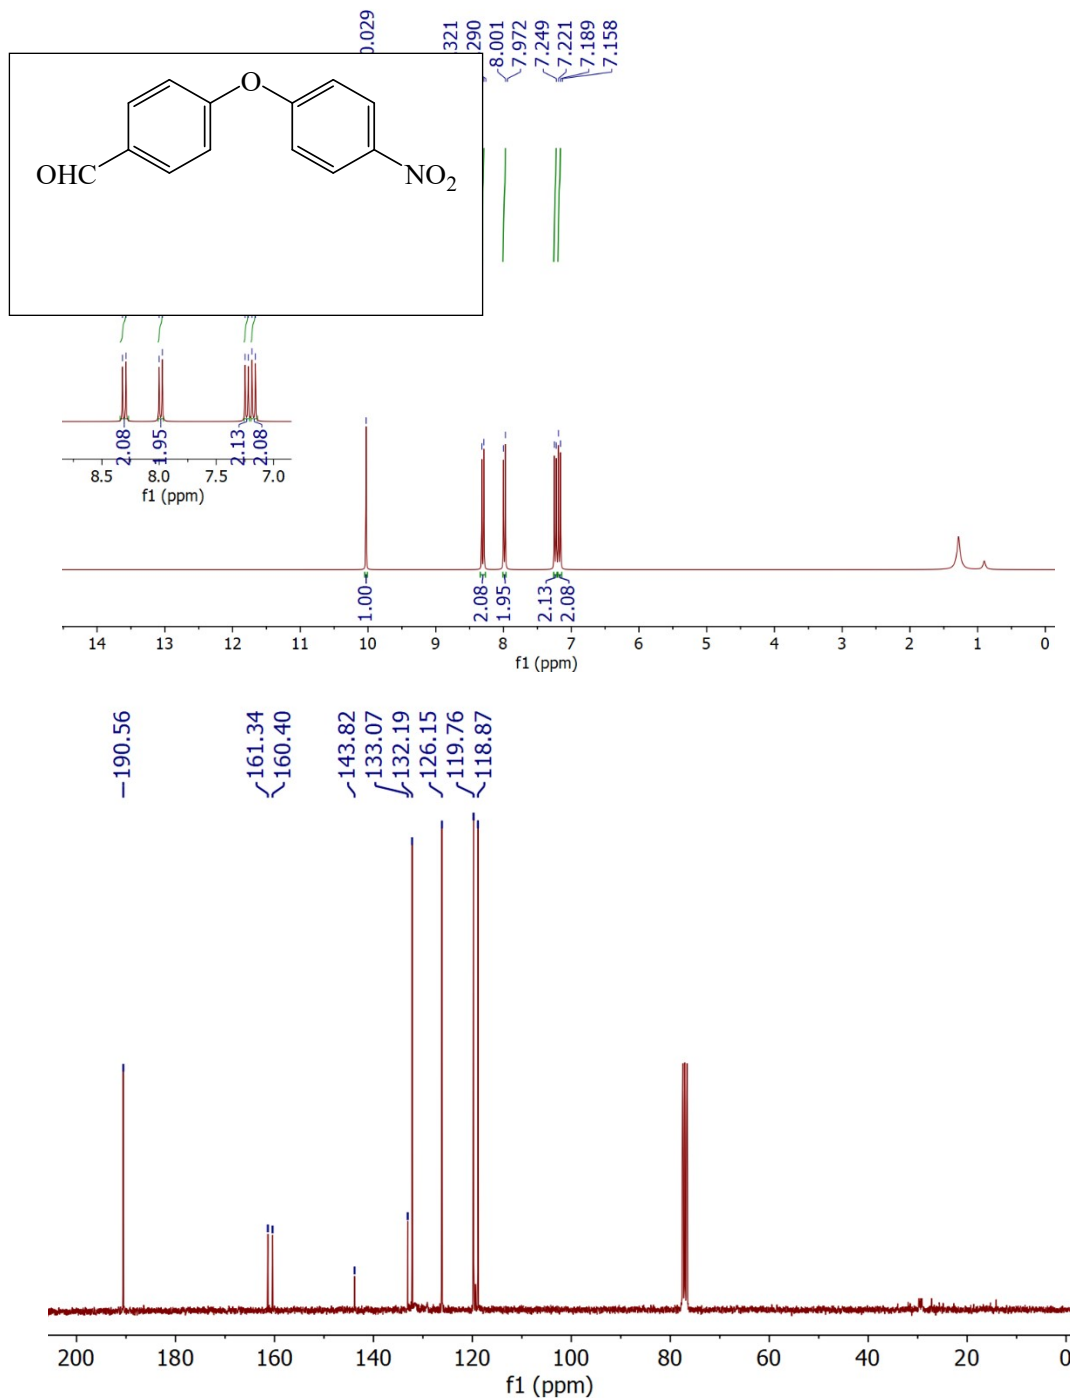

**Figure S12.** <sup>1</sup>H NMR and <sup>13</sup>C NMR spectra of 4-(4-nitrophenoxy) benzaldehyde

<sup>1</sup>H NMR (CDCl<sub>3</sub>, 300 MHz): δ 10.02 (s, 1 H), 8.30 (d, 2 H, *J* = 9.3 Hz), 7.90 (d, 2 H, *J* = 8.7 Hz), 7.23 (d, 2 H, *J* = 8.4 Hz), 7.17 (d, 2 H, *J* = 9.3 Hz) ppm. <sup>13</sup>C NMR (75 MHz, CDCl<sub>3</sub>), δ 190.5, 161.3, 160.4, 143.8, 133.0, 132.1, 126.1, 119.7, 118.8 ppm (Table 1, entries 6 and 10).

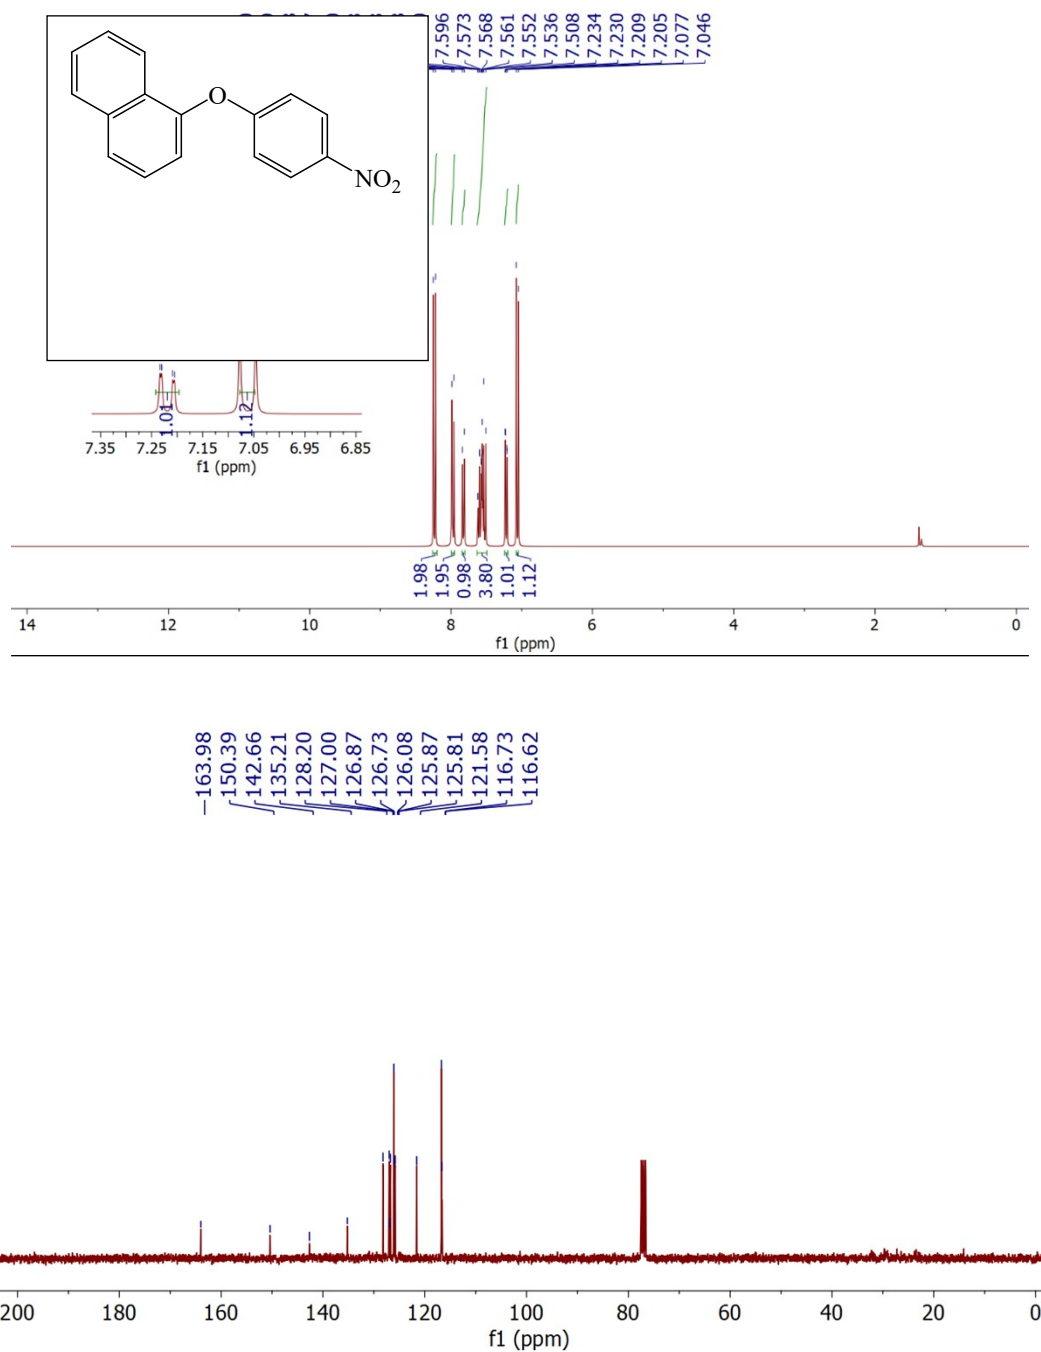

**Figure S13.**  $^1\text{H}$  NMR and  $^{13}\text{C}$  NMR spectra of 1-(4-nitrophenoxy) naphthalene

$^1\text{H}$  NMR (CDCl<sub>3</sub>, 300 MHz):  $\delta$  8.24 (d, 2 H,  $J = 9.3$  Hz), 7.90 (d, 2 H,  $J = 9.3$  Hz), 7.82 (d, 1 H,  $J = 8.1$  Hz), 7.20-7.60 (m, 5 H), 7.06 (d, 1 H,  $J = 9.3$  Hz) ppm,  $^{13}\text{C}$  NMR (75 MHz, CDCl<sub>3</sub>),  $\delta$  163.98, 150.39, 142.66, 135.2, 128.2, 127.0, 126.8, 126.7, 126.0, 125.8, 125.8, 121.5, 116.7, 116.6 ppm (Scheme 3).





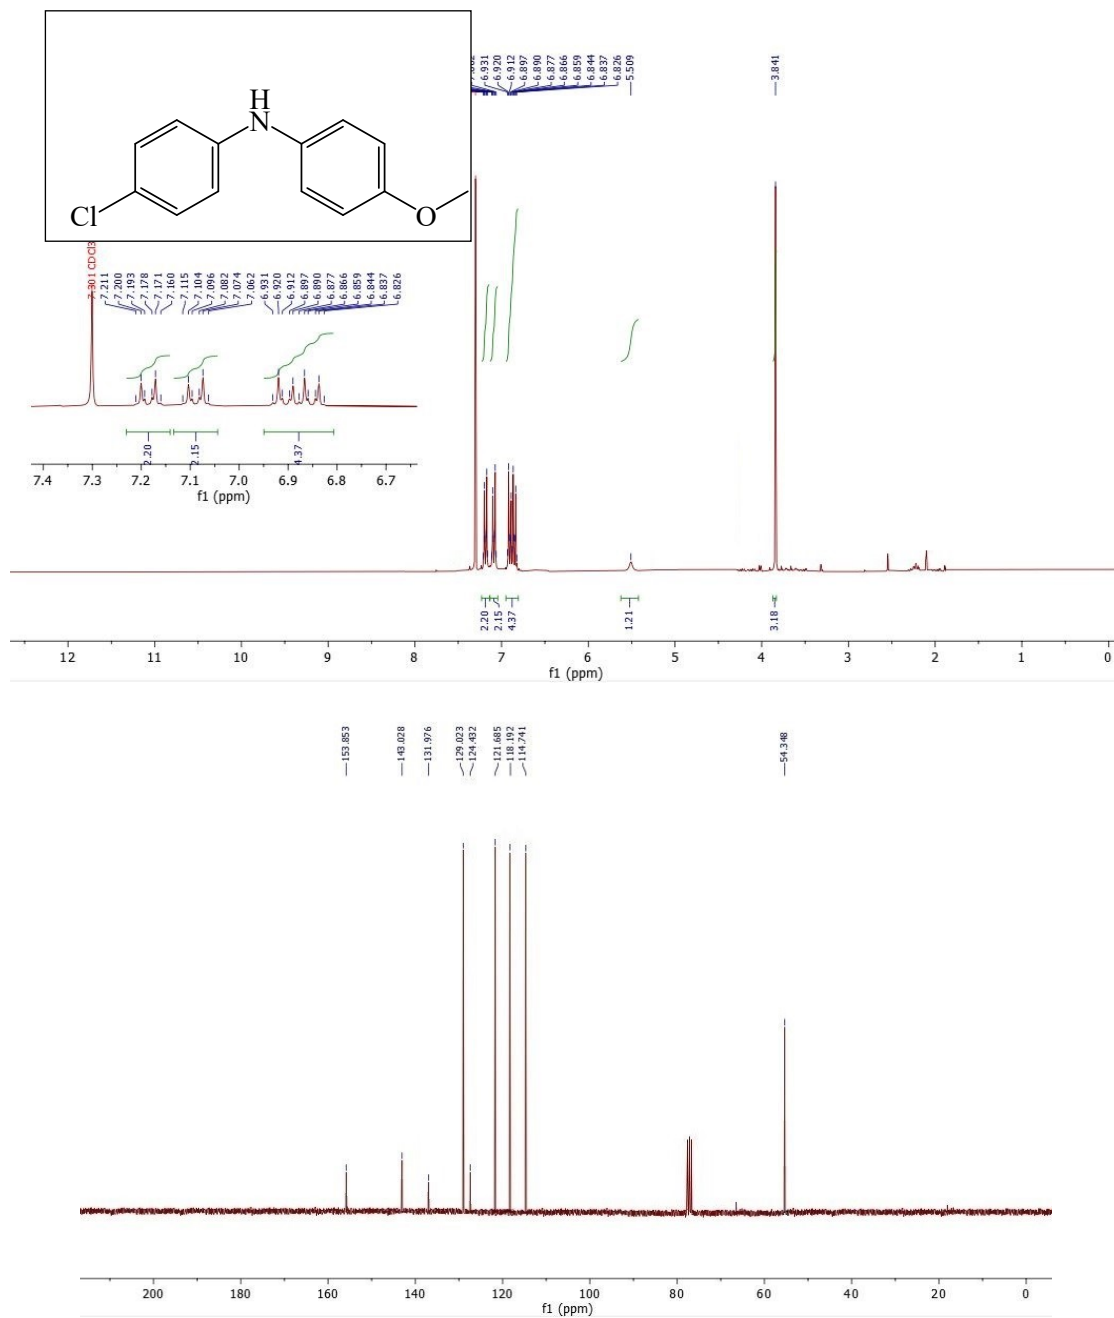

**Figure S15.**  $^1\text{H}$  NMR and  $^{13}\text{C}$  NMR spectra of 4-chloro-N-(4-methoxyphenyl) aniline

$^1\text{H}$  NMR (300 MHz,  $\text{CDCl}_3$ ):  $\delta$  7.20 (d, 2 H,  $J = 11.6$  Hz), 7.11 (d, 2 H,  $J = 12$  Hz), 6.82-6.93 (dd, 4 H,  $J = 12$  Hz,  $J = 11.6$  Hz), 5.50 (s, 1 H), 3.84 (s, 3 H) ppm,  $^{13}\text{C}$  NMR (75 MHz,  $\text{CDCl}_3$ ),  $\delta$  153.8, 143.0, 131.9, 129.0, 124.4, 121.6, 118.1, 114.7, 54.3 ppm (Table 2, entries 2 and 6).

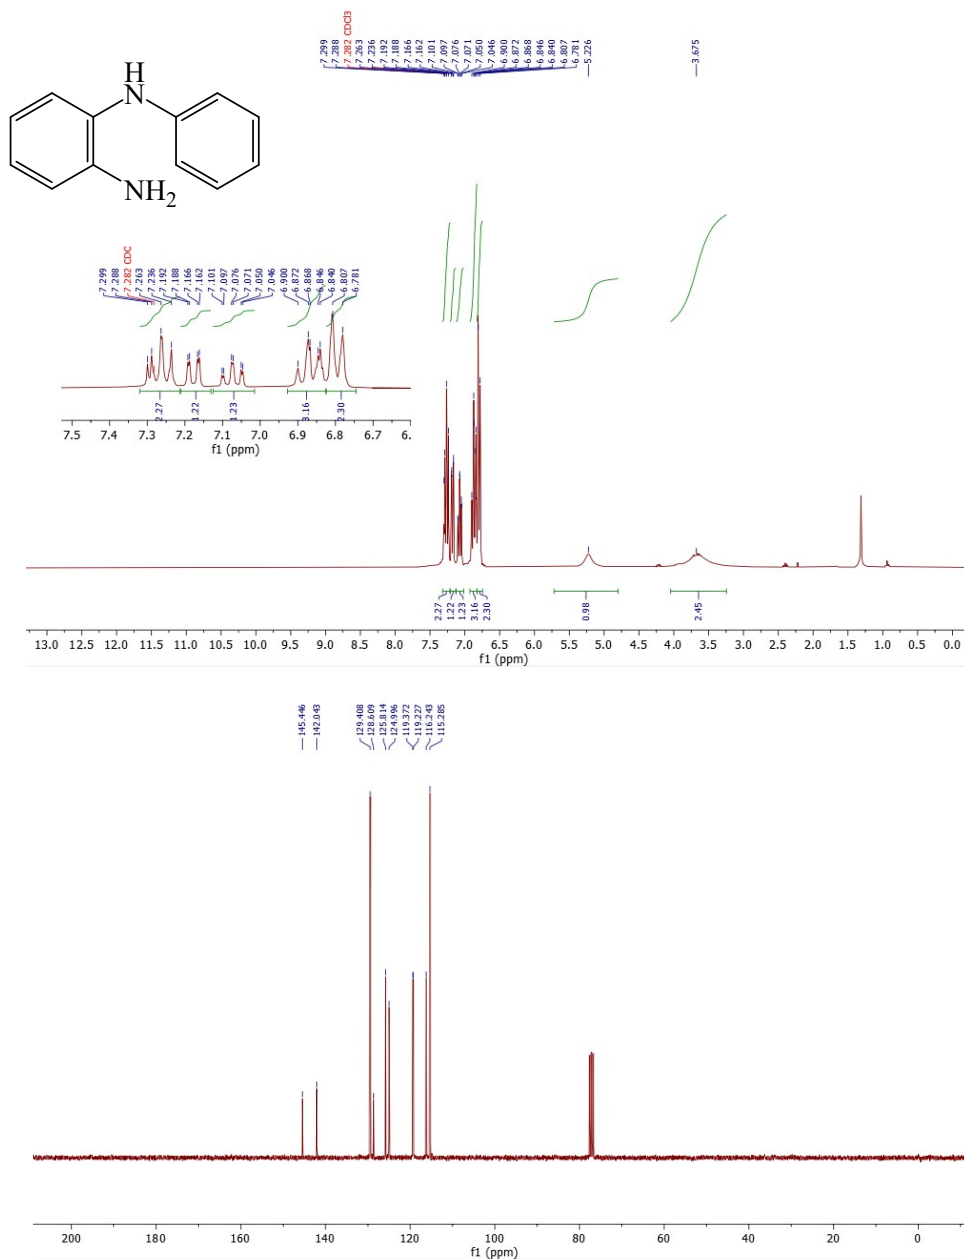

**Figure S16.** <sup>1</sup>H NMR and <sup>13</sup>C NMR spectra of 2-aminodiphenylamine

<sup>1</sup>H NMR (300 MHz, DMSO):  $\delta$  7.23-7.29 (m, 2 H), 7.18 (dd, 1 H,  $J = 10.4$  Hz), 7.07 (t, 1 H,  $J = 10.4$  Hz), 6.86 (t, 3 H,  $J = 11.2$  Hz), 6.80 (d, 2 H,  $J = 10.4$  Hz), 5.22 (s, 1 H), 3.67 (s, 2 H) ppm, <sup>13</sup>C NMR (75 MHz, CDCl<sub>3</sub>),  $\delta$  145.4, 142.0, 129.4, 128.6, 125.8, 124.9, 119.3, 119.2, 116.2, 115.2 ppm (Table 2. entries 3, 7 and 10).

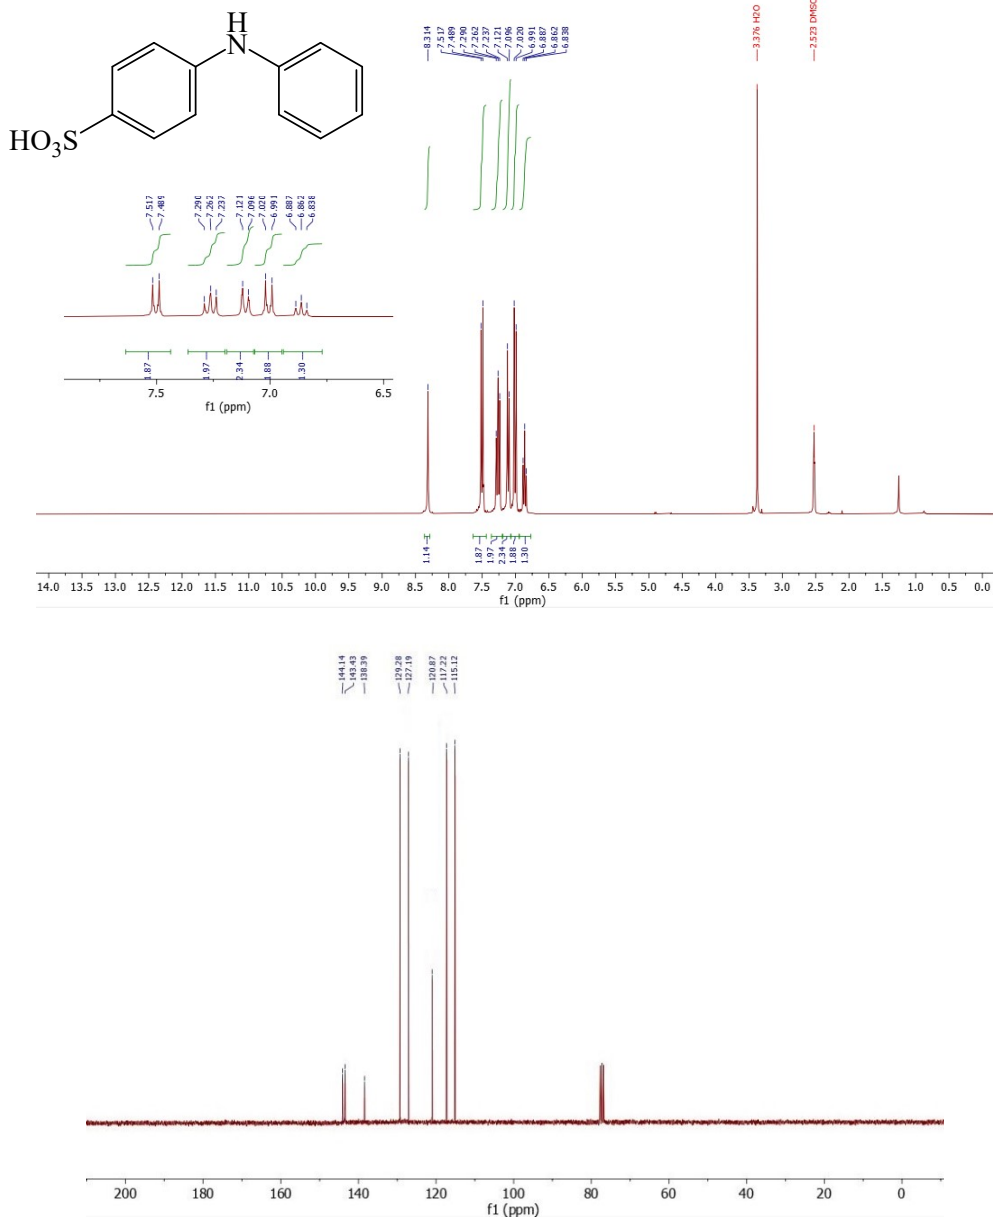

**Figure S17.** <sup>1</sup>H NMR and <sup>13</sup>C NMR spectra of 4-sulfodiphenylamine

<sup>1</sup>H NMR (300 MHz, CDCl<sub>3</sub>): δ 8.31 (s, 1 H), 7.51 (d, 2 H, *J* = 11.2 Hz), 7.26 (t, 2 H, *J* = 10.0 Hz), 7.12 (d, 2 H, *J* = 10.0 Hz), 7.02 (d, 2 H, *J* = 11.6 Hz), 6.86 (t, 1 H, *J* = 9.6 Hz) ppm, <sup>13</sup>C NMR (75 MHz, CDCl<sub>3</sub>), δ 144.1, 143.4, 138.3, 129.2, 127.1, 120.8, 117.2, 115.1 ppm (Table 2, entries 4, 8 and 11).

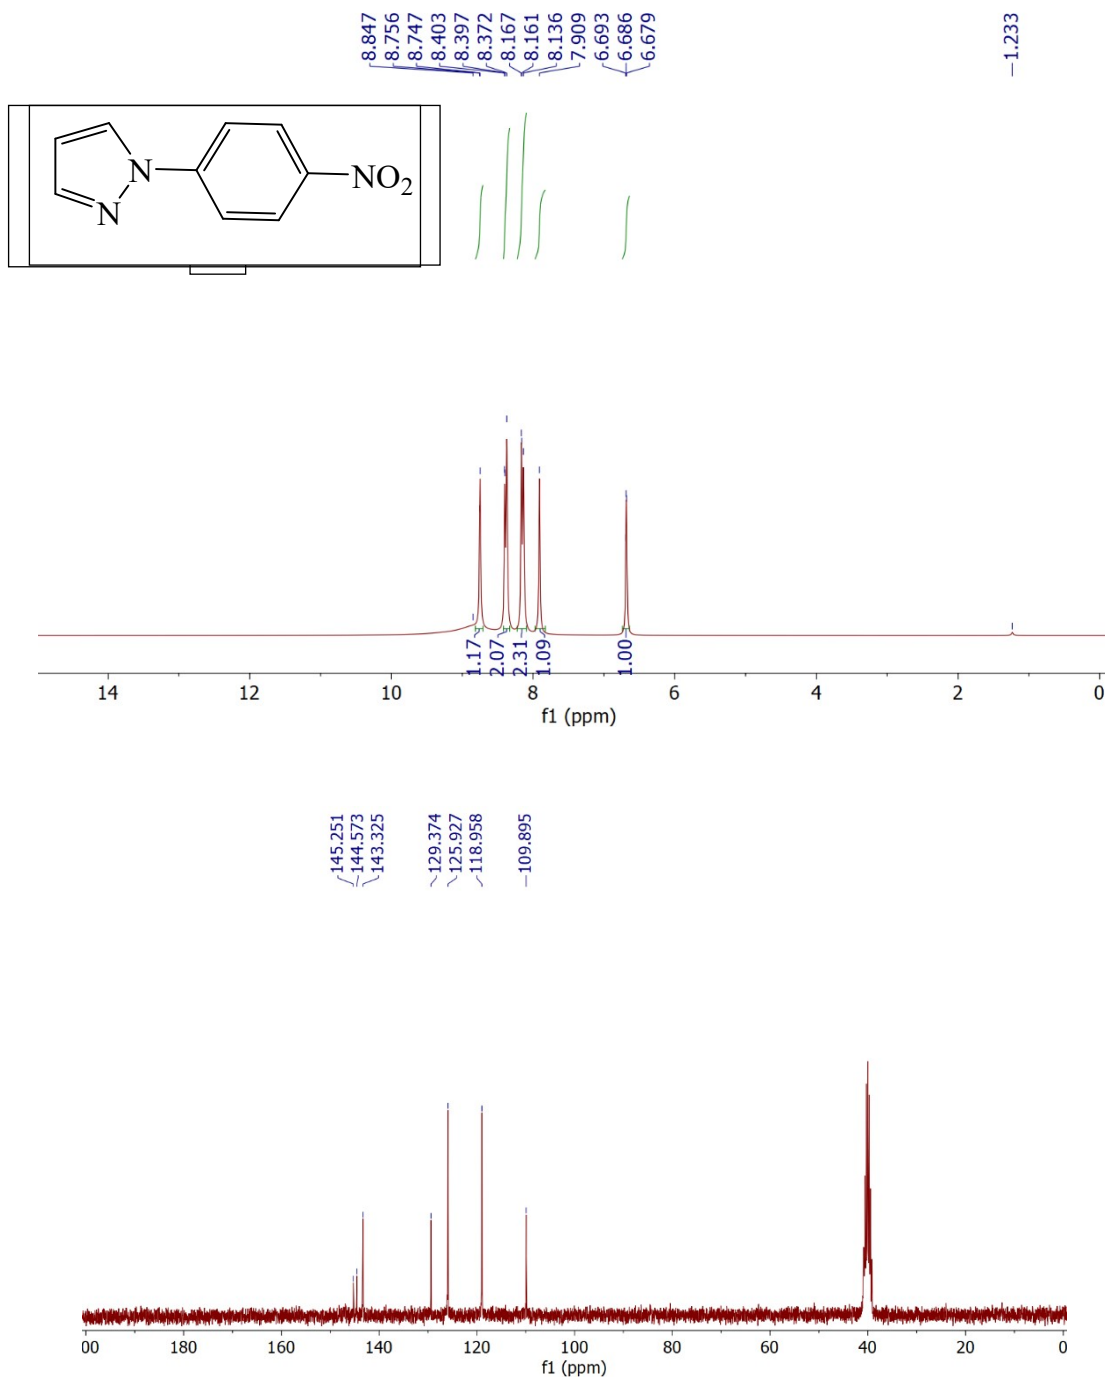

**Figure S18.** <sup>1</sup>H NMR and <sup>13</sup>C NMR spectra of 1-(4-nitrophenyl)-1H-pyrazole

<sup>1</sup>H NMR (300 MHz, DMSO-d<sub>6</sub>): δ 8.74-8.84 (m, 1H), 8.37-8.40 (m, 2H), 8.15 (m, 2H), 7.90 (s, 1H), 6.68 (t, *J* = 2.1 Hz, 1H) ppm, <sup>13</sup>C NMR (75 MHz, DMSO-d<sub>6</sub>): δ 145.41, 144.42, 142.81, 127.12, 125.42, 118.60, 109.41 ppm (Table 3).

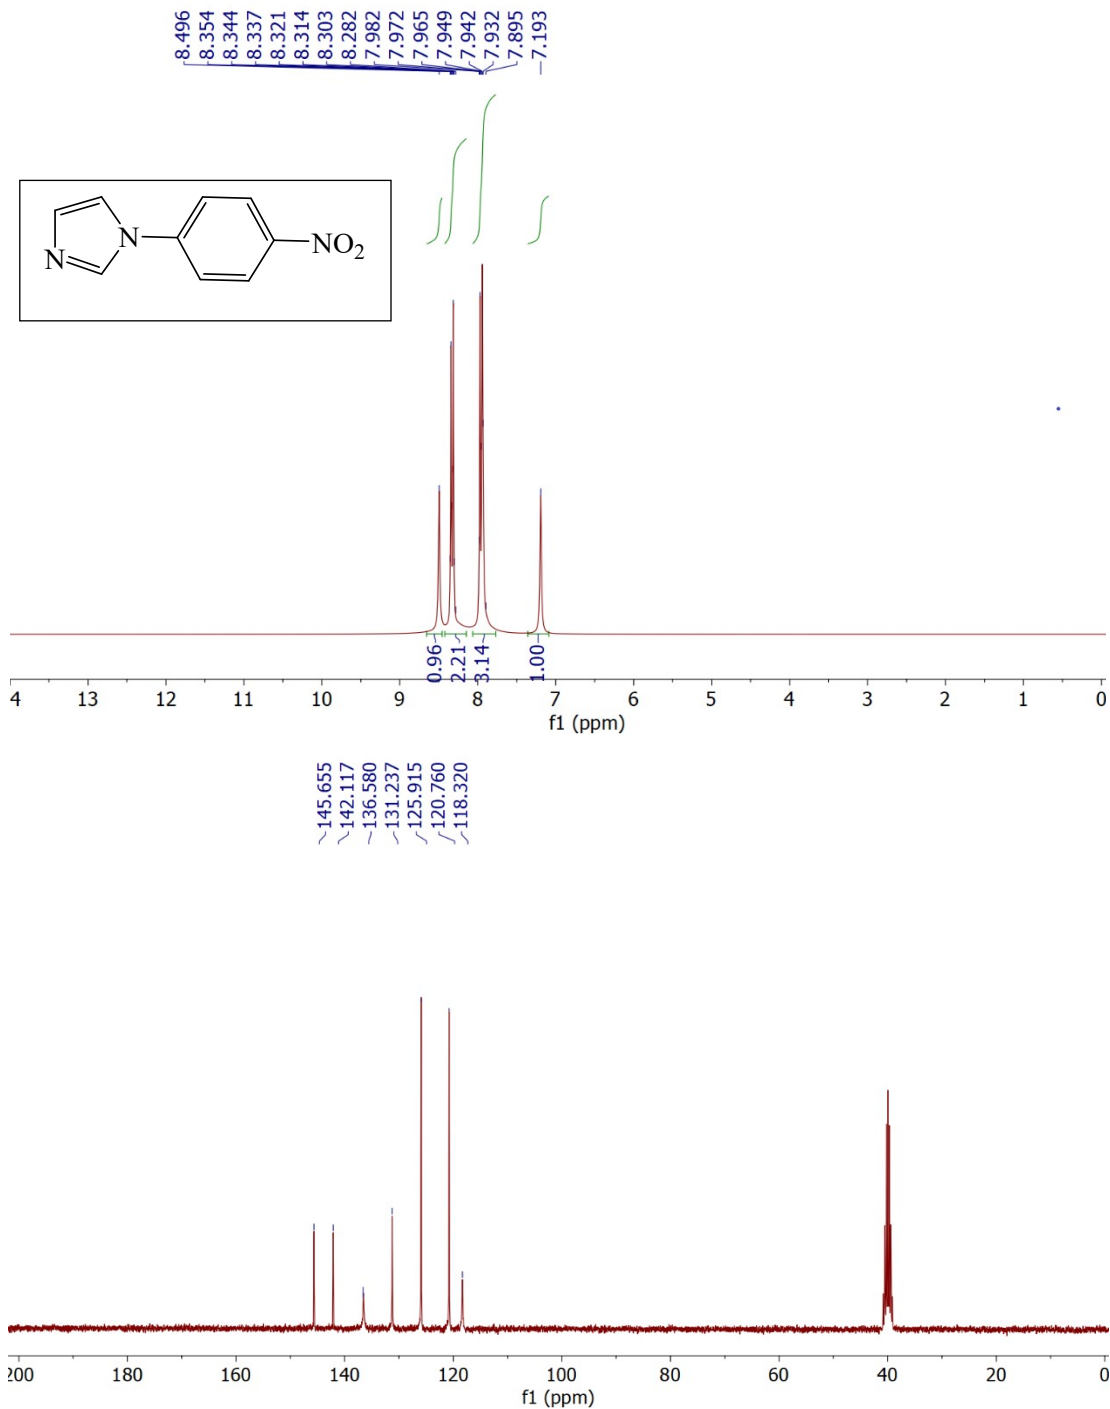

**Figure S19.** <sup>1</sup>H NMR and <sup>13</sup>C NMR spectra of 1-(4-Nitrophenyl)-1H-imidazole  
<sup>1</sup>H NMR (300 MHz, DMSO-d<sub>6</sub>): δ 8.49 (s, 1H), 8.30-8.35 (m, 2H), 7.93-7.98 (m, 3H), 7.19 (s, 1H) ppm, <sup>13</sup>C NMR (75 MHz, DMSO-d<sub>6</sub>): δ 145.6, 142.1, 136.5, 131.2, 125.9, 120.7, 118.3 ppm (Table 3).

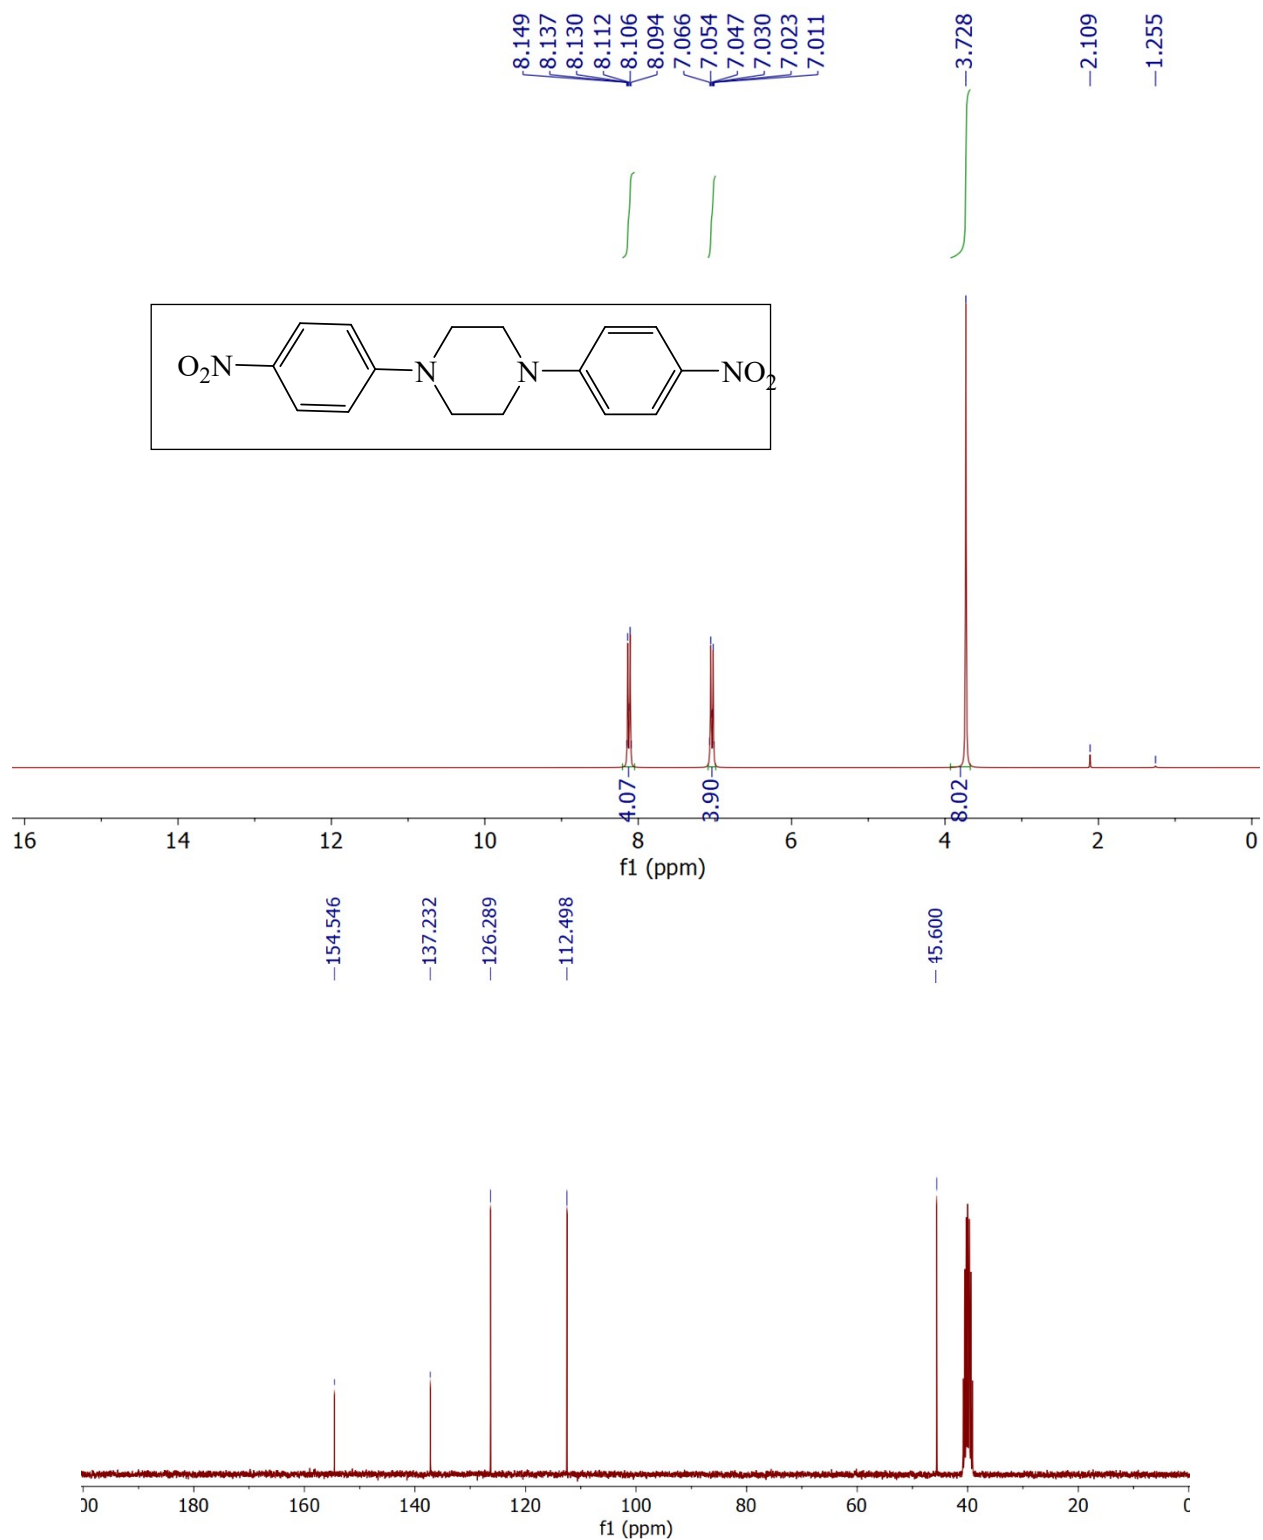

**Figure S20.** <sup>1</sup>H NMR and <sup>13</sup>C NMR spectra of 1,4-bis(4-nitrophenyl) piperazine

<sup>1</sup>H NMR (300 MHz, DMSO-d<sub>6</sub>): δ 8.09-8.14 (m, 4 H), 7.01-7.06 (m, 4 H), 3.72 (s, 8 H) ppm, <sup>13</sup>C NMR (75 MHz, DMSO-d<sub>6</sub>): δ 154.4, 137.2, 126.2, 122.2, 45.6 ppm (Table 3).

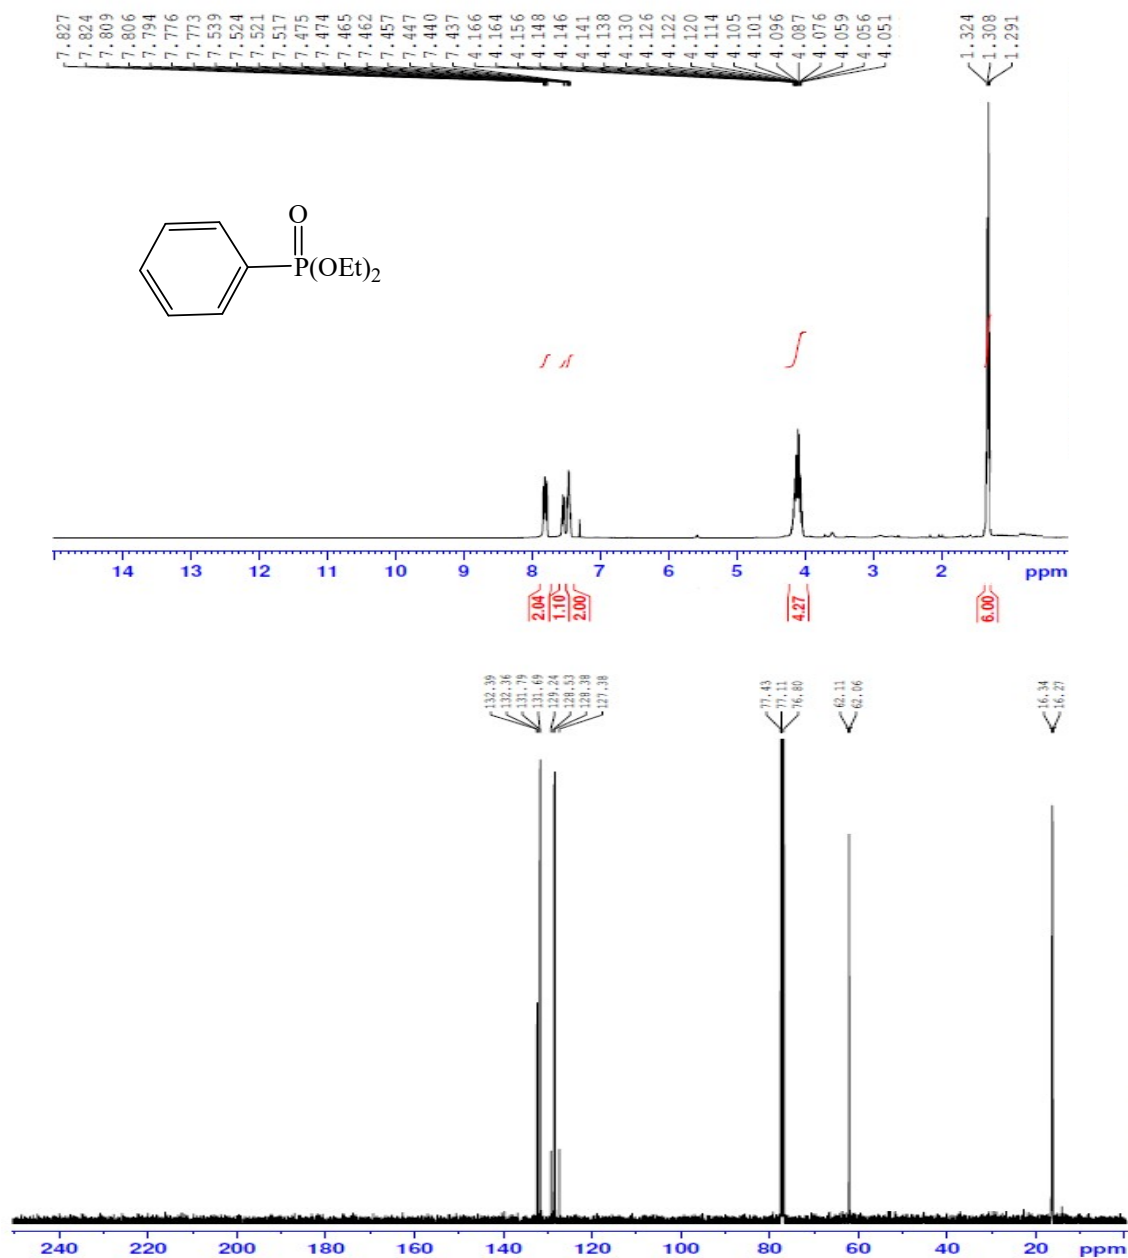

**Figure S21.** <sup>1</sup>H NMR and <sup>13</sup>C NMR spectra of diethylphenylphosphonate

<sup>1</sup>H NMR (400 MHz, CDCl<sub>3</sub>): δ 7.80 (dd, 2 H, *J* = 13.2, *J*<sub>HH</sub> = 8.4 Hz), 7.51-7.53 (m, 1 H), 7.42-7.47 (m, 2 H), 4.16-4.05 (m, 4 H), 1.30 (t, 6 H, *J*<sub>HH</sub> = 6.8 Hz) ppm. <sup>13</sup>C NMR (100 MHz, CDCl<sub>3</sub>), δ 132.3 (d, *J*<sub>CP</sub> = 3.0 Hz), 131.7 (d, *J*<sub>CP</sub> = 10.0 Hz), 128.4 (d, *J*<sub>CP</sub> = 15.0 Hz), 128.3 (d, *J*<sub>CP</sub> = 186.0 Hz), 62.0 (d, *J*<sub>CP</sub> = 5.0 Hz), 16.3 (d, *J*<sub>CP</sub> = 7.0 Hz) ppm (Table 4, entries 1, 6, 12, 15 and 16).

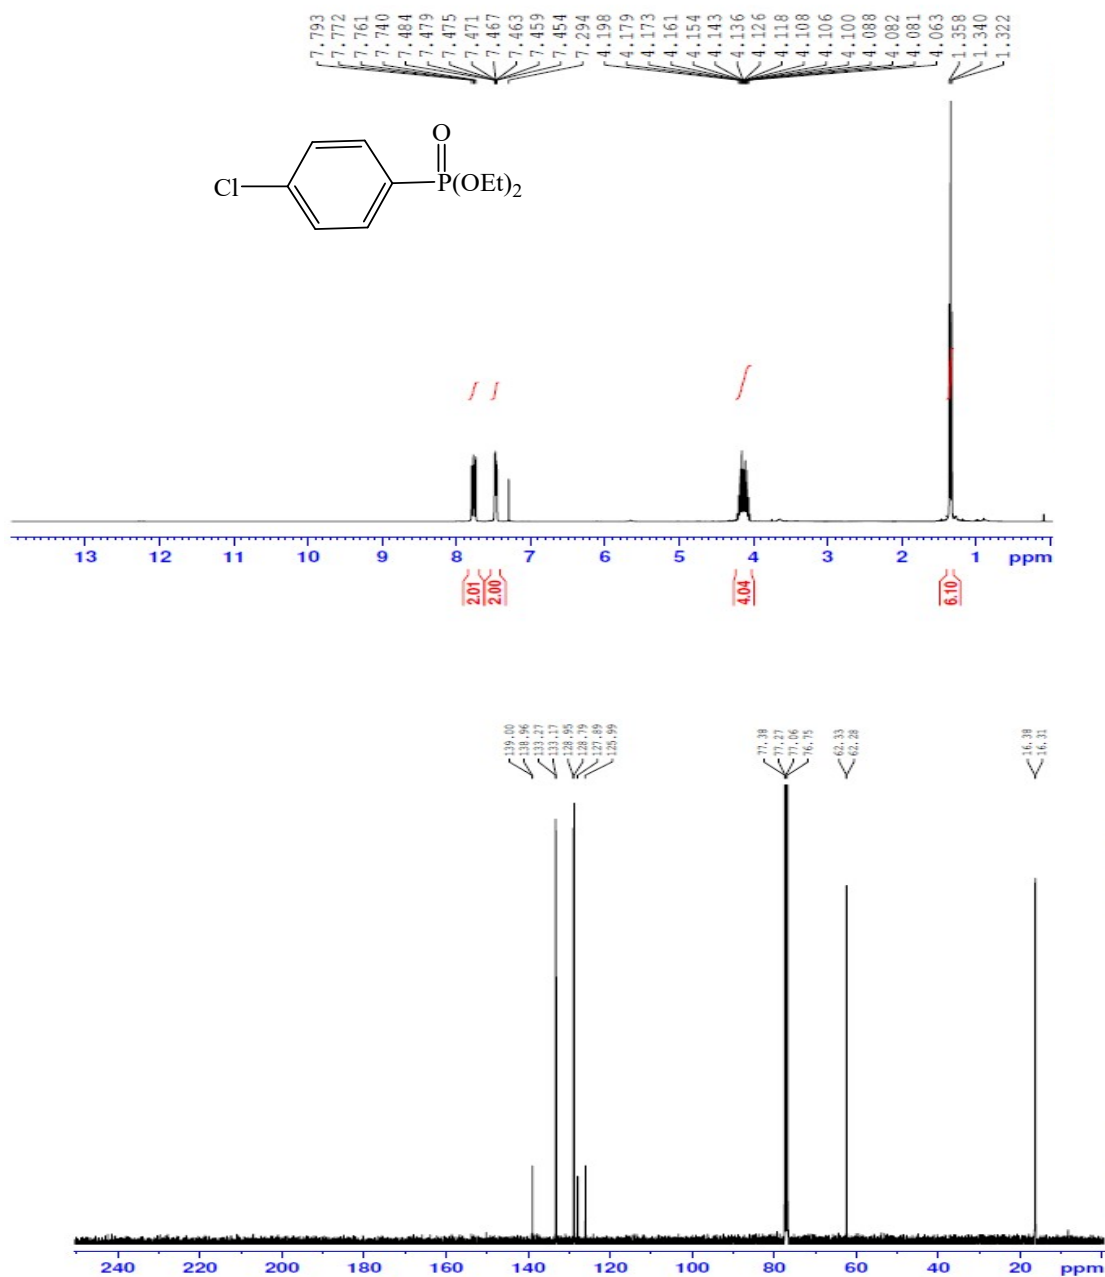

**Figure S22.**  $^1\text{H}$  NMR and  $^{13}\text{C}$  NMR spectra of diethyl 4-chlorophenylphosphonate  
 $^1\text{H}$  NMR (400 MHz,  $\text{CDCl}_3$ ):  $\delta$  7.76 (dd, 2 H,  $J_{\text{HH}} = 12.8$  Hz,  $J_{\text{HH}} = 8.4$  Hz), 7.46 (dd, 2 H,  $J_{\text{HH}} = 8.2$  Hz,  $J_{\text{HH}} = 3.6$  Hz), 4.06-4.19 (m, 4 H), 1.34 (t, 6 H,  $J_{\text{HH}} = 7.2$  Hz) ppm.  $^{13}\text{C}$  NMR (100 MHz,  $\text{CDCl}_3$ ),  $\delta$  138.9 (d,  $J_{\text{CP}} = 4.0$  Hz), 133.2 (d,  $J_{\text{CP}} = 10.0$  Hz), 128.8 (d,  $J_{\text{CP}} = 16.0$  Hz), 126.9 (d,  $J_{\text{CP}} = 190.0$  Hz), 62.2 (d,  $J_{\text{CP}} = 5.0$  Hz), 16.3 (d,  $J_{\text{CP}} = 7.0$  Hz) ppm (Table 4, entries 3 and 9).



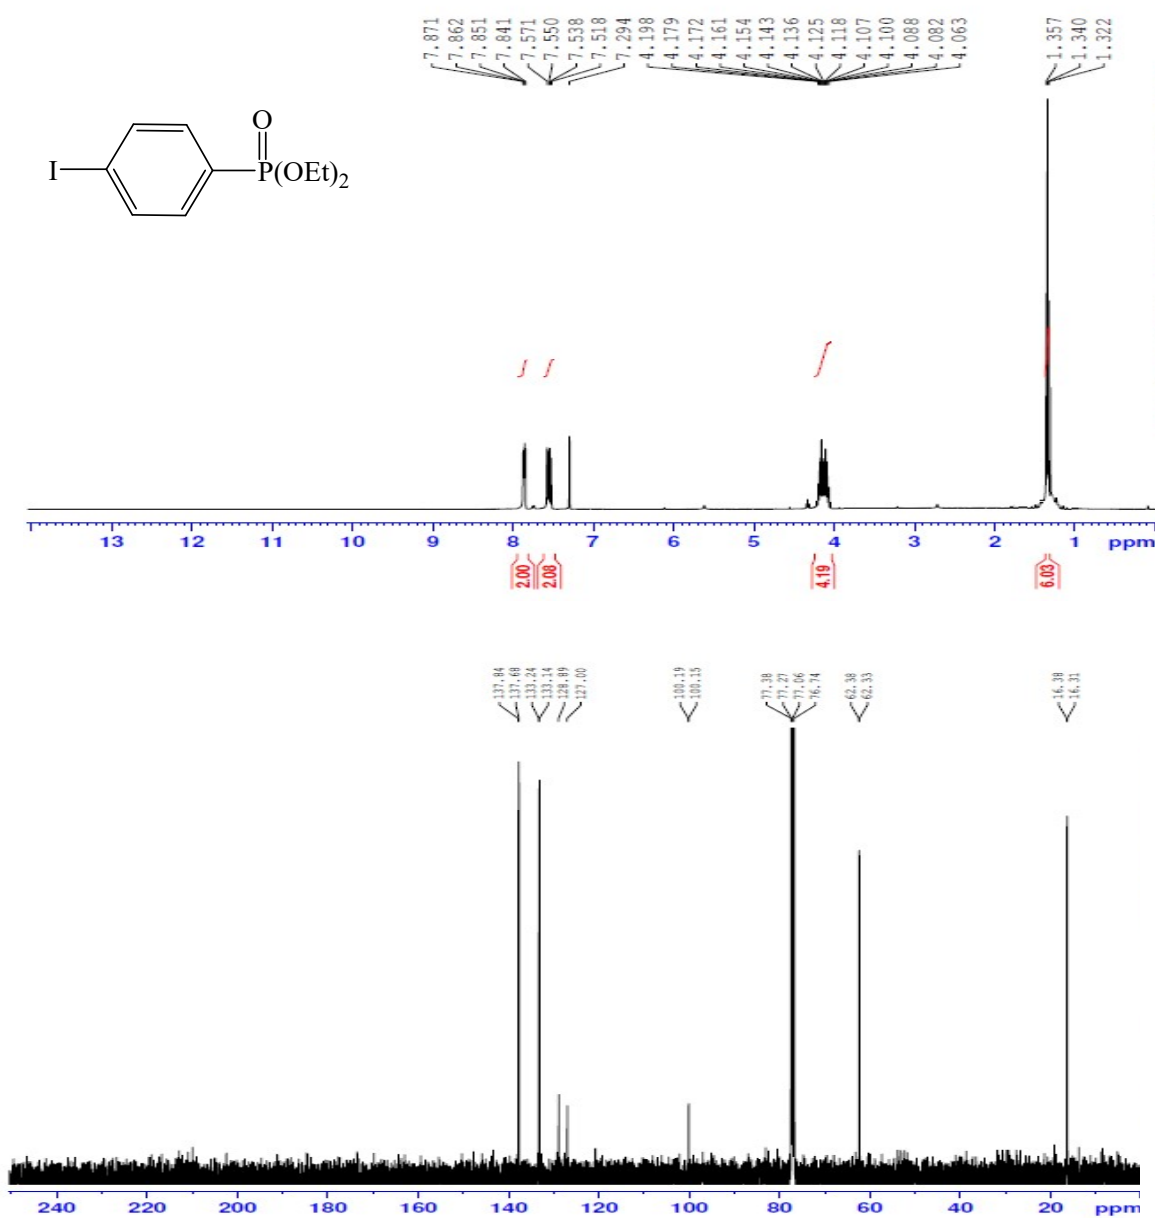

**Figure S23.**  $^1\text{H}$  NMR and  $^{13}\text{C}$  NMR spectra of diethyl 4-iodophenylphosphonate

$^1\text{H}$ NMR (400 MHz,  $\text{CDCl}_3$ ):  $\delta$  7.85 (dd, 2 H,  $J_{\text{HH}} = 8.2$  Hz,  $J_{\text{HH}} = 3.6$  Hz), 7.54 (dd, 2 H,  $J_{\text{HH}} = 13$  Hz,  $J_{\text{HH}} = 8.0$  Hz), 4.06-4.19 (m, 4 H), 1.34 (t, 6 H,  $J_{\text{HH}} = 6.8$  Hz) ppm.  $^{13}\text{C}$  NMR (100 MHz,  $\text{CDCl}_3$ ),  $\delta$  137.7 (d,  $J_{\text{CP}} = 16.0$  Hz), 133.1 (d,  $J_{\text{CP}} = 10.0$  Hz), 127.4 (d,  $J_{\text{CP}} = 189.0$  Hz), 100.1 (d,  $J_{\text{CP}} = 4.0$  Hz), 62.3 (d,  $J_{\text{CP}} = 5.0$  Hz), 16.3 (d,  $J_{\text{CP}} = 7.0$  Hz) ppm (Table 4, entry 4).

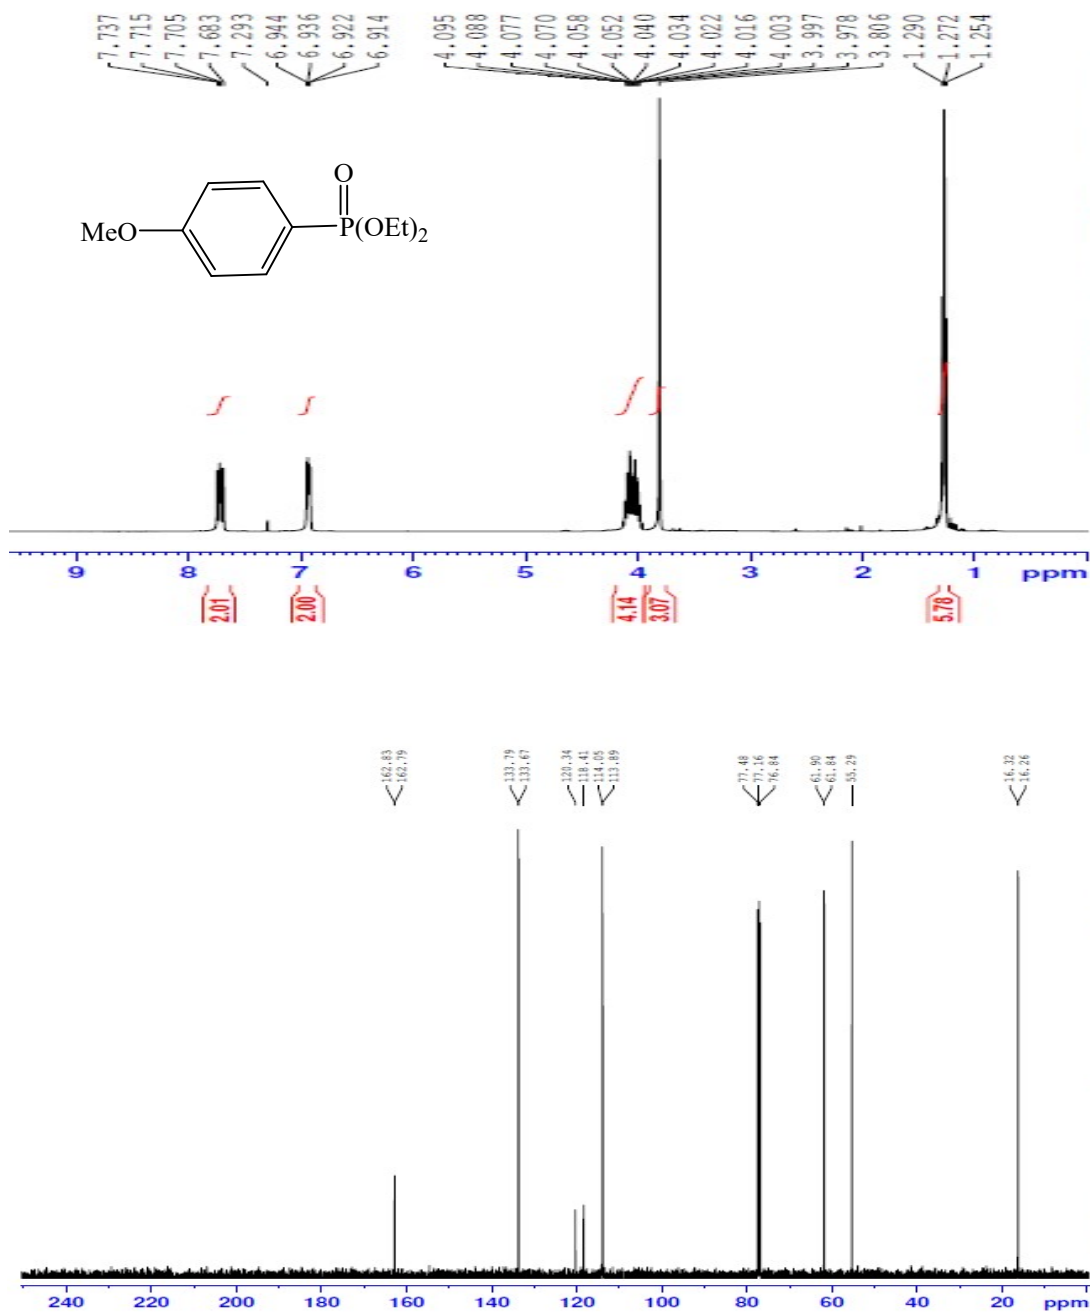

**Figure S24.**  $^1\text{H}$  NMR and  $^{13}\text{C}$  NMR spectra of diethyl 4-methoxyphenylphosphonate

$^1\text{H}$  NMR (400 MHz,  $\text{CDCl}_3$ ):  $\delta$  7.71 (dd, 1 H,  $J_{\text{HH}} = 12.8$  Hz,  $J_{\text{HH}} = 8.8$  Hz), 6.92 (dd, 1 H,  $J_{\text{HH}} = 8.8$  Hz,  $J_{\text{HH}} = 3.2$  Hz), 3.97-4.09 (m, 4 H), 3.80 (s, 3 H), 1.27 (t, 6 H,  $J_{\text{HH}} = 7.2$  Hz) ppm.  $^{13}\text{C}$  NMR (100 MHz,  $\text{CDCl}_3$ ),  $\delta$  162.8 (d,  $J_{\text{CP}} = 4.0$  Hz), 133.7 (d,  $J_{\text{CP}} = 12.0$  Hz), 119.3 (d,  $J_{\text{CP}} = 193.0$  Hz), 113.9 (d,  $J_{\text{CP}} = 16.0$  Hz), 61.8 (d,  $J_{\text{CP}} = 6.0$  Hz), 16.2 (d,  $J_{\text{CP}} = 6.0$  Hz) ppm (Table 4, entries 2 and 8).

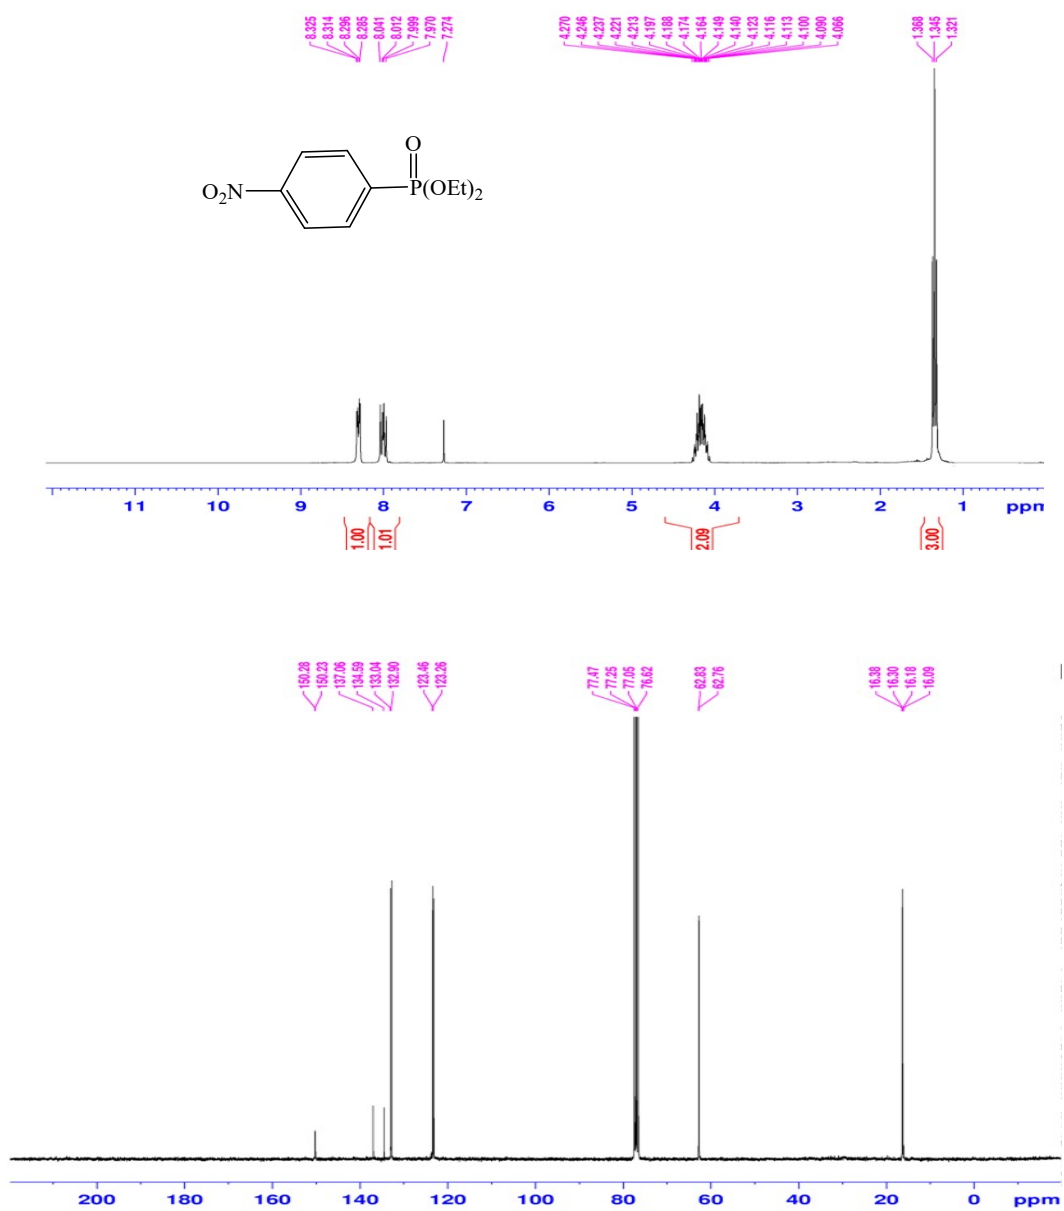

**Figure S25.**  $^1\text{H}$  NMR and  $^{13}\text{C}$  NMR spectra of diethyl (4-nitrophenyl) phosphonate

$^1\text{H}$  NMR (300 MHz,  $\text{CDCl}_3$ ):  $\delta$  8.30 (dd, 1 H,  $J_{\text{HH}} = 8.7$  Hz,  $J_{\text{HH}} = 3.3$  Hz), 8.00 (dd, 1 H,  $J_{\text{HH}} = 12.7$  Hz,  $J_{\text{HH}} = 8.7$  Hz), 4.06-4.27 (m, 4 H), 1.34 (t, 6 H,  $J_{\text{HH}} = 6.9$  Hz) ppm.  $^{13}\text{C}$  NMR (75 MHz,  $\text{CDCl}_3$ ),  $\delta$  150.2 (d,  $J_{\text{CP}} = 3.7$  Hz), 135.8 (d,  $J_{\text{CP}} = 185.2$  Hz), 133.0 (d,  $J_{\text{CP}} = 10.5$  Hz), 123.3 (d,  $J_{\text{CP}} = 15.0$  Hz), 62.7 (d,  $J_{\text{CP}} = 5.2$  Hz), 16.3 (d,  $J_{\text{CP}} = 6.0$  Hz), 16.1 (d,  $J_{\text{CP}} = 6.7$  Hz) ppm (Table 4, entries 7 and 14).

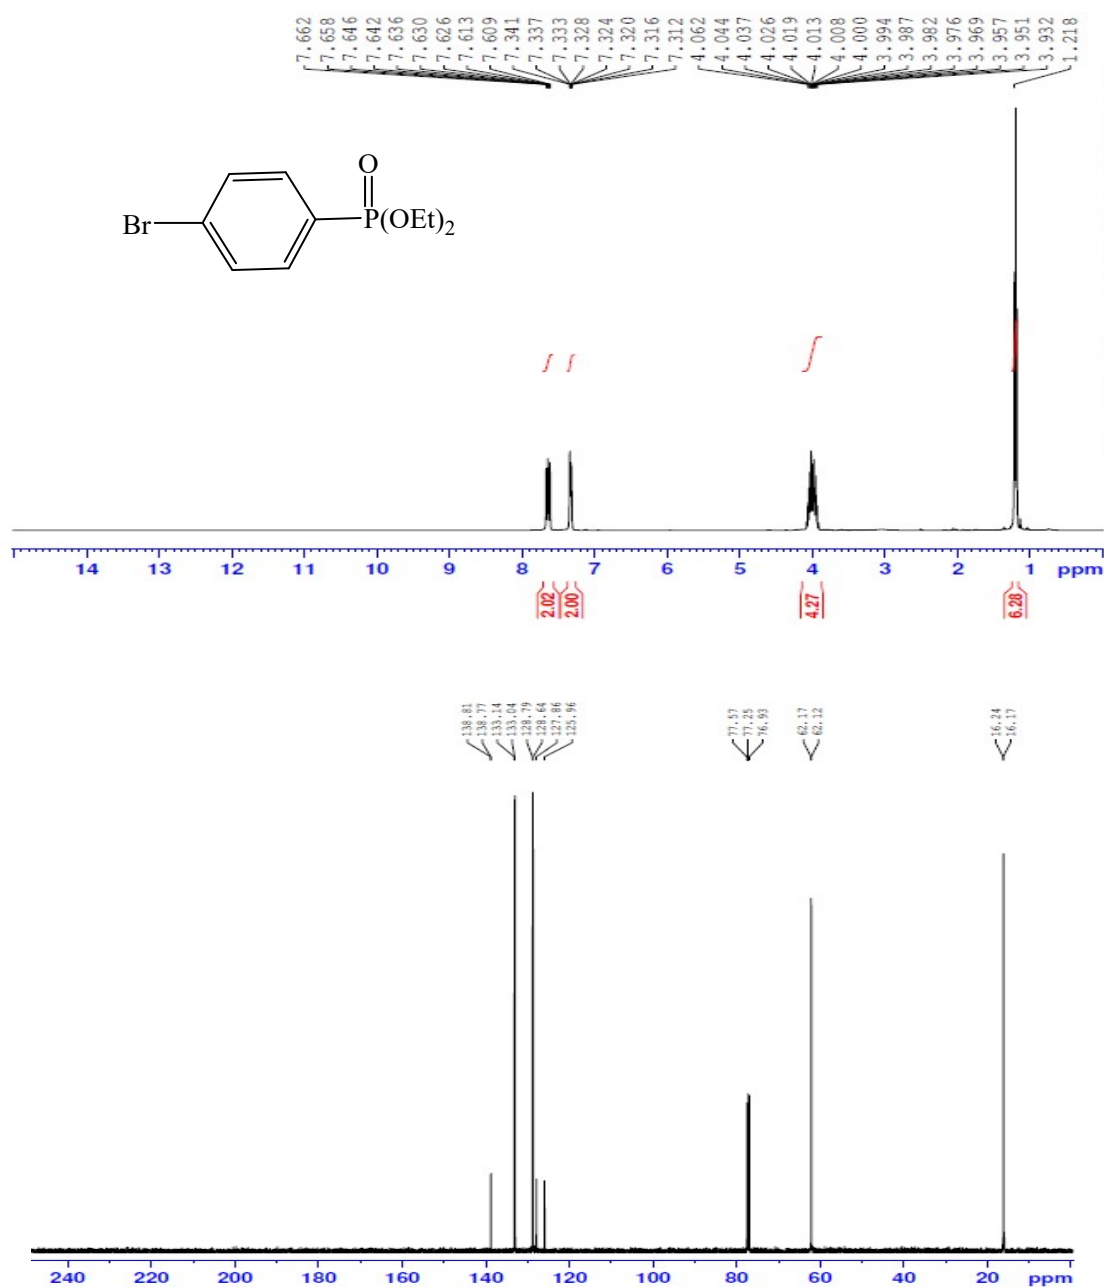

**Figure S26.**  $^1\text{H}$  NMR and  $^{13}\text{C}$  NMR spectra of diethyl 4-bromophenylphosphonate

$^1\text{H}$  NMR (400 MHz,  $\text{CDCl}_3$ ):  $\delta$  7.63 (dd, 2 H,  $J_{\text{HH}} = 13.2$  Hz,  $J_{\text{HH}} = 8.4$  Hz), 7.32 (dd, 2 H,  $J_{\text{HH}} = 8.4$  Hz,  $J_{\text{HH}} = 3.2$  Hz), 3.93-4.06 (m, 4 H), 1.20 (t, 6 H,  $J_{\text{HH}} = 7.2$  Hz) ppm.  $^{13}\text{C}$  NMR (100 MHz,  $\text{CDCl}_3$ ),  $\delta$  138.7 (d,  $J_{\text{CP}} = 4.0$  Hz), 133.0 (d,  $J_{\text{CP}} = 10.0$  Hz), 128.7 (d,  $J_{\text{CP}} = 15.0$  Hz), 126.9 (d,  $J_{\text{CP}} = 190.0$  Hz), 62.1 (d,  $J_{\text{CP}} = 5.0$  Hz), 16.2 (d,  $J_{\text{CP}} = 7.0$  Hz) ppm (Table 4, entry 10).

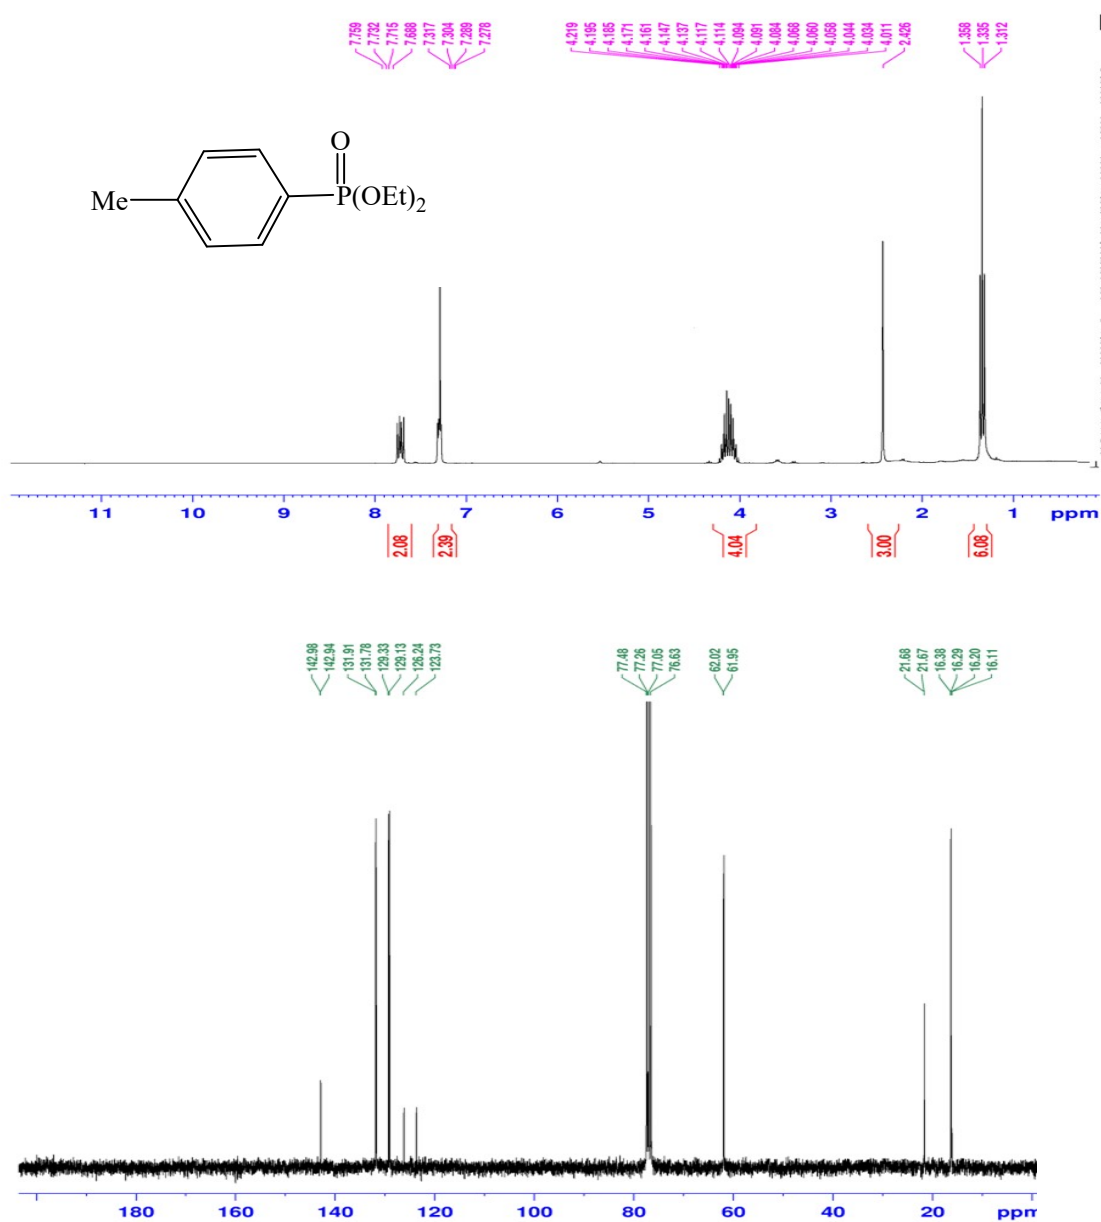

**Figure S27.**  $^1\text{H}$  NMR and  $^{13}\text{C}$  NMR spectra of diethyl 4-tolylphosphonate

$^1\text{H}$  NMR (300 MHz,  $\text{CDCl}_3$ ):  $\delta$  7.72 (dd, 2 H,  $J_{\text{HH}} = 13.2$  Hz,  $J_{\text{HH}} = 8.1$  Hz), 7.29 (dd, 2 H,  $J_{\text{HH}} = 8.1$  Hz,  $J_{\text{HH}} = 3.3$  Hz), 4.01-4.21 (m, 4 H), 2.42 (s, 3 H), 1.33 (t, 6 H,  $J_{\text{HH}} = 6.9$  Hz) ppm.  $^{13}\text{C}$  NMR (75 MHz,  $\text{CDCl}_3$ ),  $\delta$  142.9 (d,  $J_{\text{CP}} = 3.0$  Hz), 131.8 (d,  $J_{\text{CP}} = 9.7$  Hz), 129.2 (d,  $J_{\text{CP}} = 15.0$  Hz), 124.9 (d,  $J_{\text{CP}} = 188.2$  Hz), 61.9 (d,  $J_{\text{CP}} = 5.2$  Hz), 21.6, 16.3 (d,  $J_{\text{CP}} = 6.7$  Hz), 16.1 (d,  $J_{\text{CP}} = 6.7$  Hz) ppm (Table 4, entry 13).

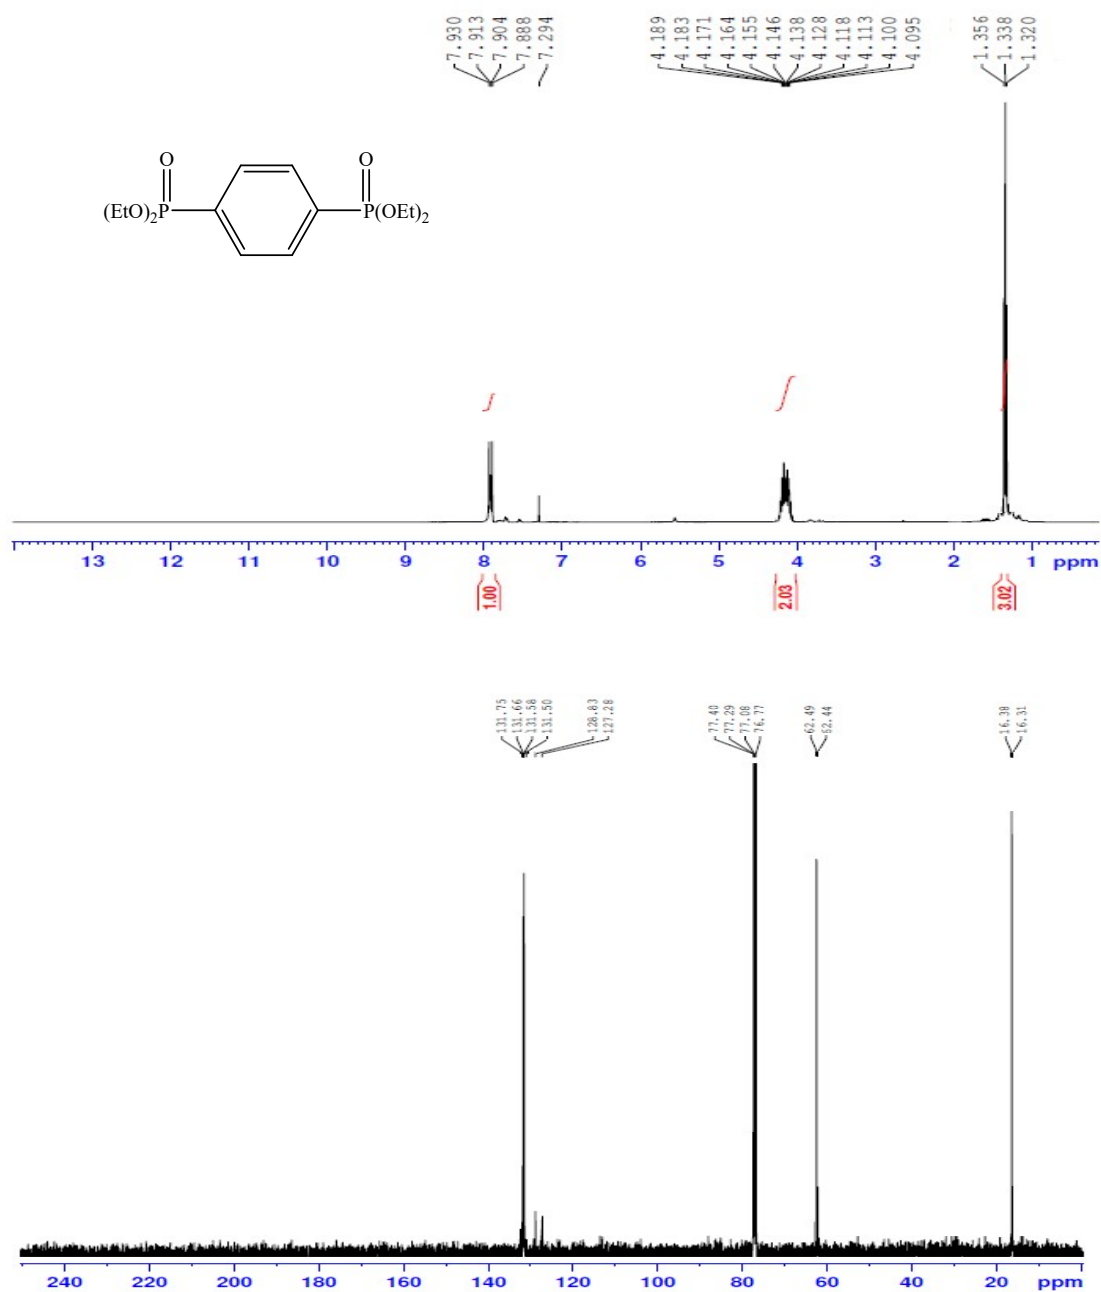

**Figure S28.**  $^1\text{H}$  NMR and  $^{13}\text{C}$  NMR spectra of tetraethylphenylbis (phosphonate)

$^1\text{H}$  NMR (400 MHz,  $\text{CDCl}_3$ ):  $\delta$  7.90 (dd, 4 H,  $J_{\text{HH}} = 10.2$  Hz,  $J_{\text{HH}} = 6.8$  Hz), 4.09-4.18 (m, 8 H), 1.33 (t, 12 H,  $J_{\text{HH}} = 7.2$  Hz), ppm.  $^{13}\text{C}$  NMR (100 MHz,  $\text{CDCl}_3$ ),  $\delta$  131.6 (dd,  $J_{\text{CP}} = 16.5$  Hz,  $J_{\text{CP}} = 8.0$  Hz), 128.0 (d,  $J_{\text{CP}} = 155.0$  Hz), 62.4 (d,  $J_{\text{CP}} = 5.0$  Hz), 16.3 (d,  $J_{\text{CP}} = 7.0$  Hz) ppm (Table 4, entries 5 and 11).

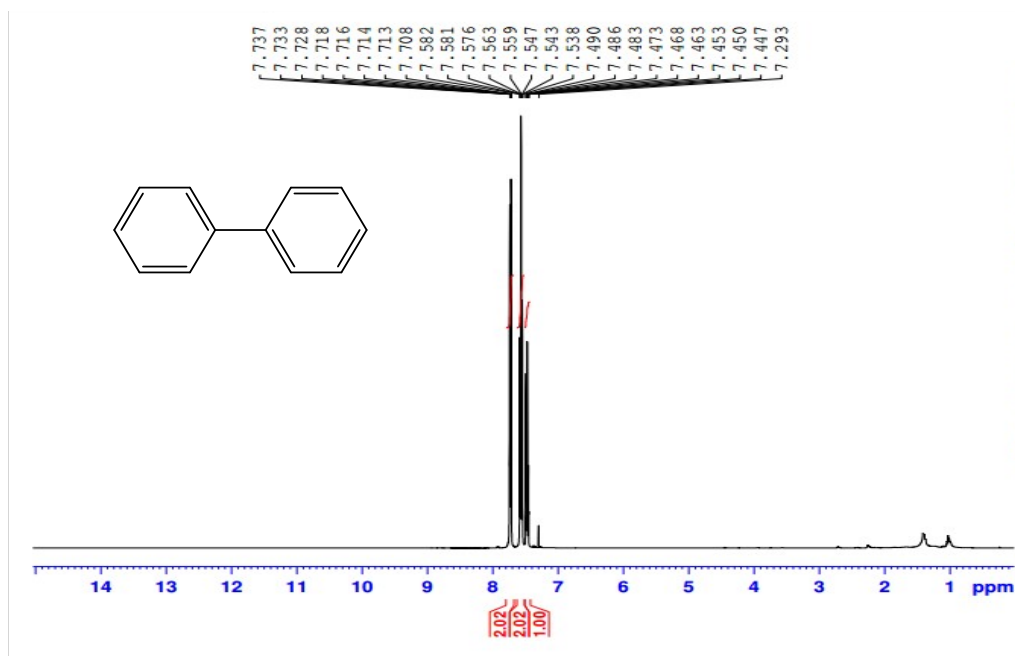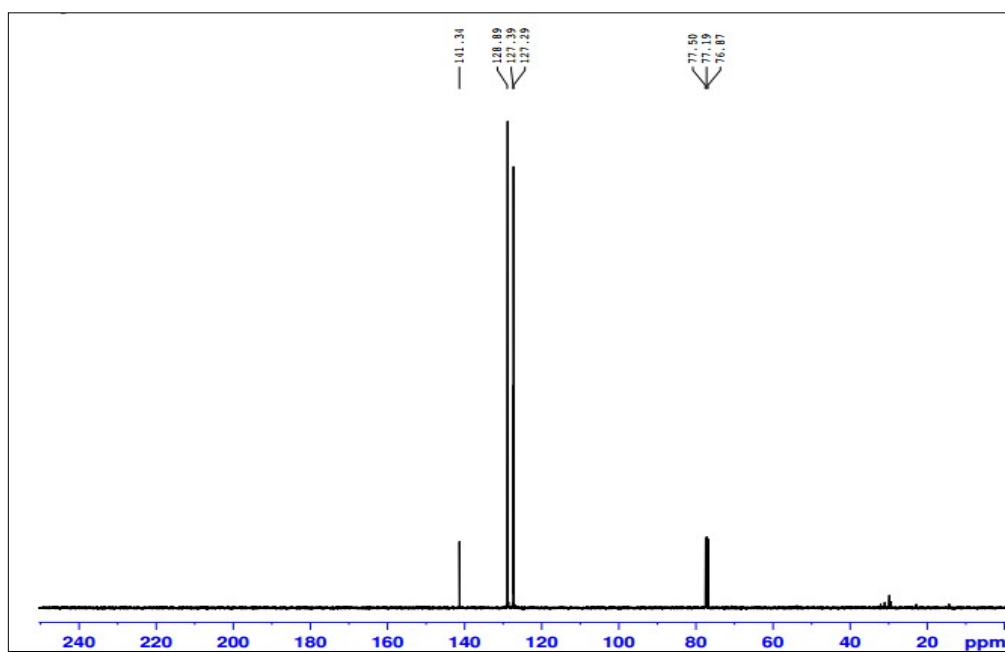

**Figure S29.** <sup>1</sup>H NMR and <sup>13</sup>C NMR spectra of biphenyl

<sup>1</sup>H NMR (400 MHz, CDCl<sub>3</sub>): δ 7.72 (d, 4 H, *J* = 6.8 Hz), 7.56 (t, 4 H, *J* = 8.0 Hz), 7.46 (t, 2 H, *J* = 7.2 Hz) ppm. <sup>13</sup>C NMR (100 MHz, CDCl<sub>3</sub>), δ 141.3, 128.8, 127.3, 127.2 ppm (Table 5, entries 1, 5 and 10).

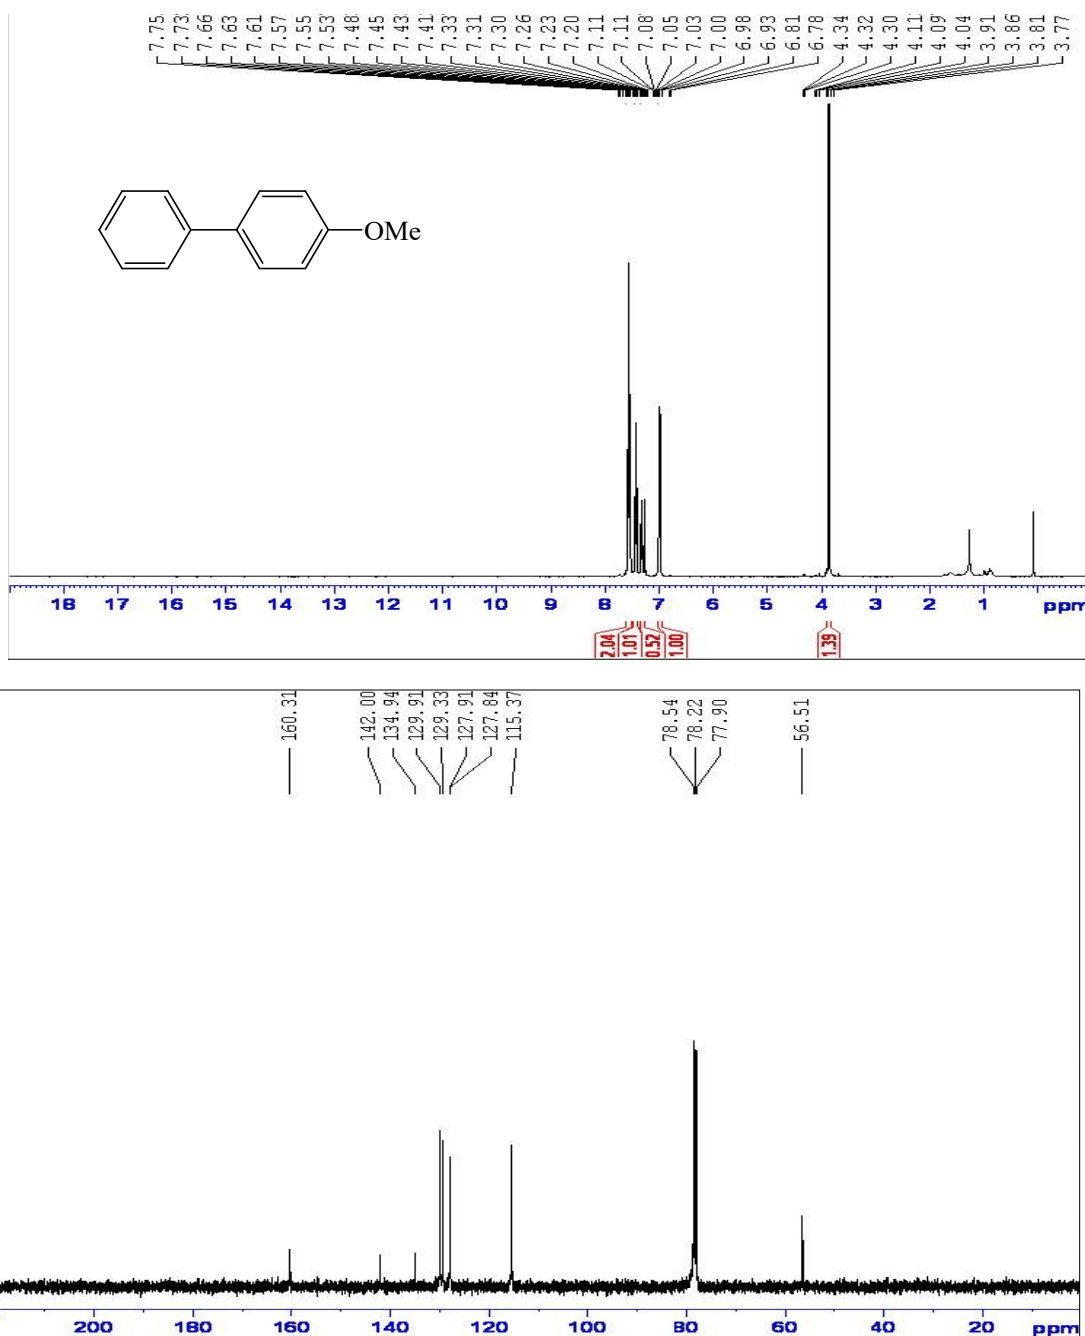

**Figure S30.**  $^1\text{H}$  NMR and  $^{13}\text{C}$  NMR spectra of 4-methoxybiphenyl

$^1\text{H}$  NMR (400 MHz,  $\text{CDCl}_3$ ):  $\delta$  7.55 (t, 4 H,  $J = 8.8$  Hz), 7.43 (t, 2 H,  $J = 8.0$  Hz), 7.31 (t, 1 H,  $J = 7.2$  Hz), 6.99 (d, 2 H,  $J = 8.8$  Hz), 3.83 (s, 3 H) ppm.  $^{13}\text{C}$  NMR (100 MHz,  $\text{CDCl}_3$ ),  $\delta$  160.3, 142.0, 134.9, 129.9, 129.3, 127.9, 127.8, 115.3, 56.5 ppm (Table 5, entries 2 and 6).



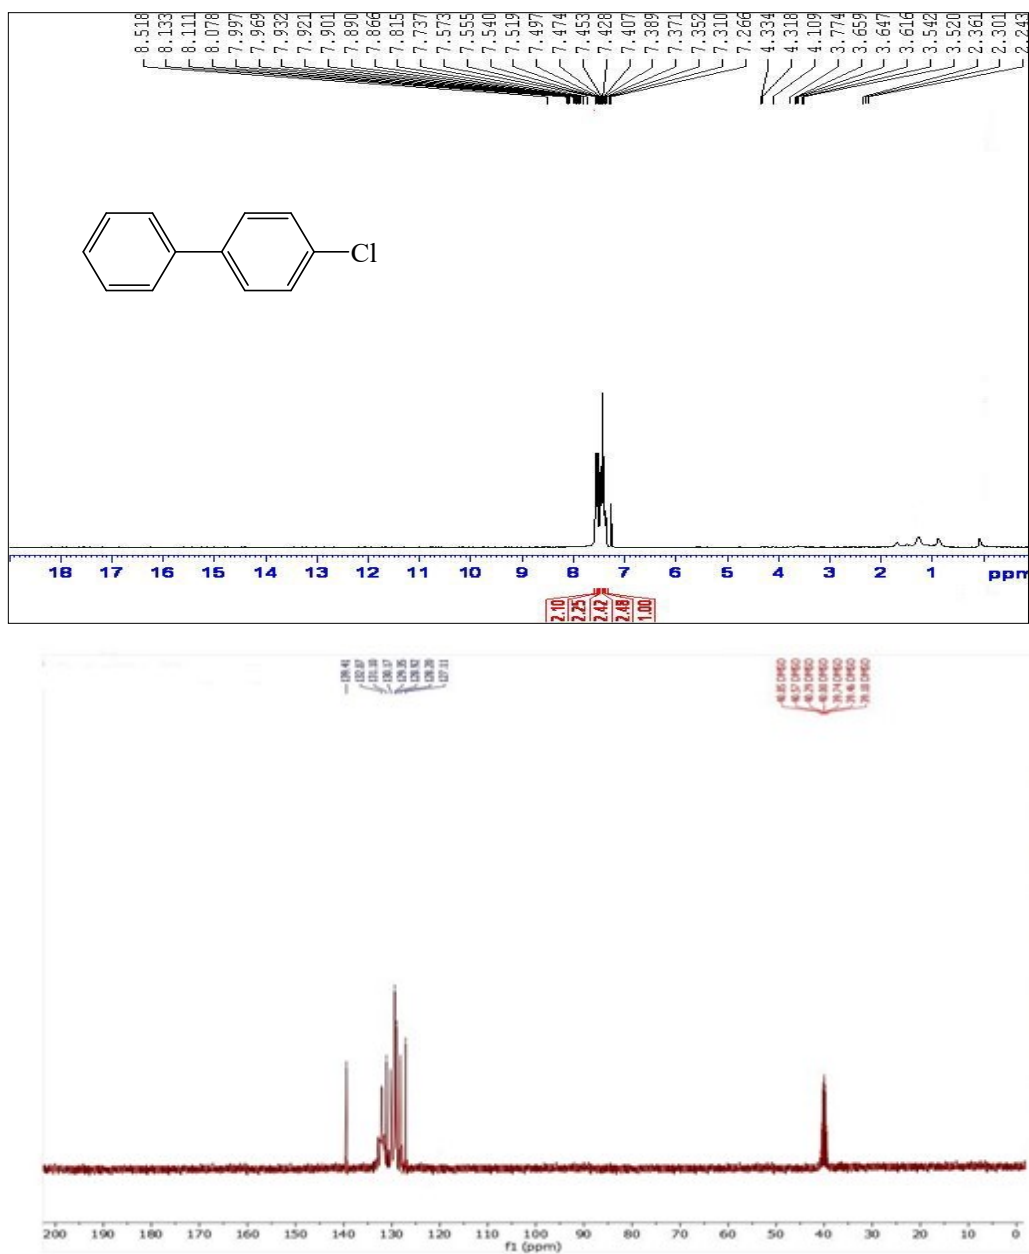

**Figure S31.** <sup>1</sup>H NMR and <sup>13</sup>C NMR spectra of 4-chlorobiphenyl

<sup>1</sup>H NMR (400 MHz, CDCl<sub>3</sub>): δ 7.51-7.57 (m, 4 H), 7.31-7.49 (m, 5 H) ppm. <sup>13</sup>C NMR (75 MHz, DMSO-d<sub>6</sub>), δ 139.4, 132.0, 131.1, 130.1, 129.3, 128.9, 128.2, 127.1 ppm (Table 5, entries 3 and 9).

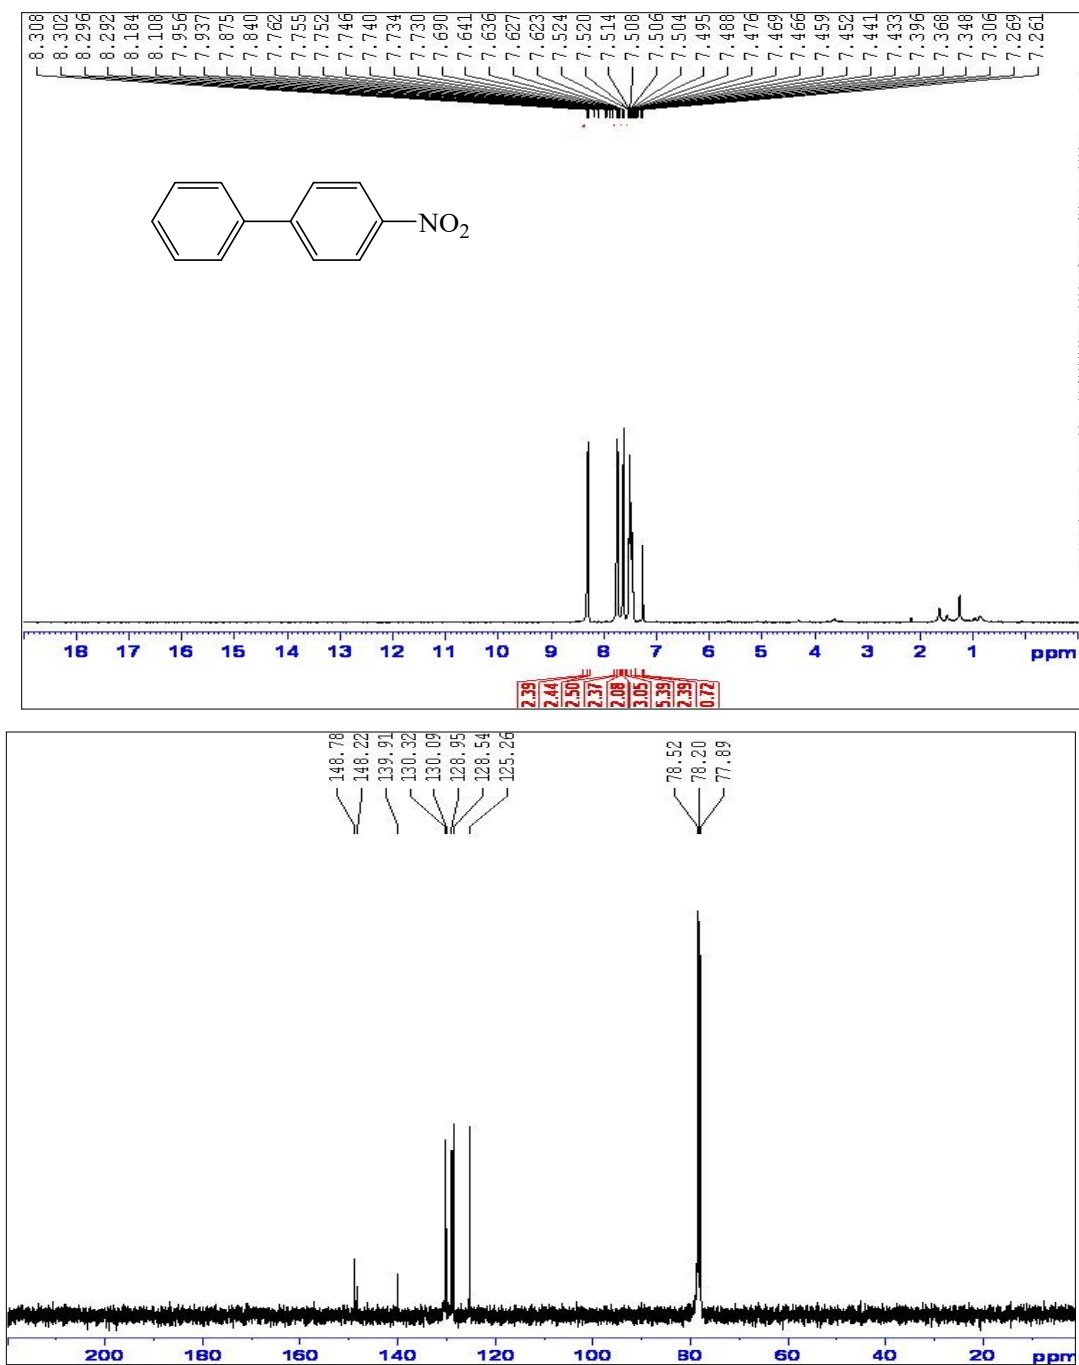

**Figure S32.** <sup>1</sup>H NMR and <sup>13</sup>C NMR spectra of 4-nitrophenyl

<sup>1</sup>H NMR (400 MHz, CDCl<sub>3</sub>): δ 8.29-8.30 (m, 2 H), 7.73-7.76 (m, 2 H), 7.62-7.64 (m, 2 H), 7.43-7.52 (m, 3 H) ppm. <sup>13</sup>C NMR (100 MHz, CDCl<sub>3</sub>), δ 148.7, 148.2, 139.9, 130.3, 130.0, 128.9, 128.5, 125.2 ppm (Table 5, entries 7 and 11).

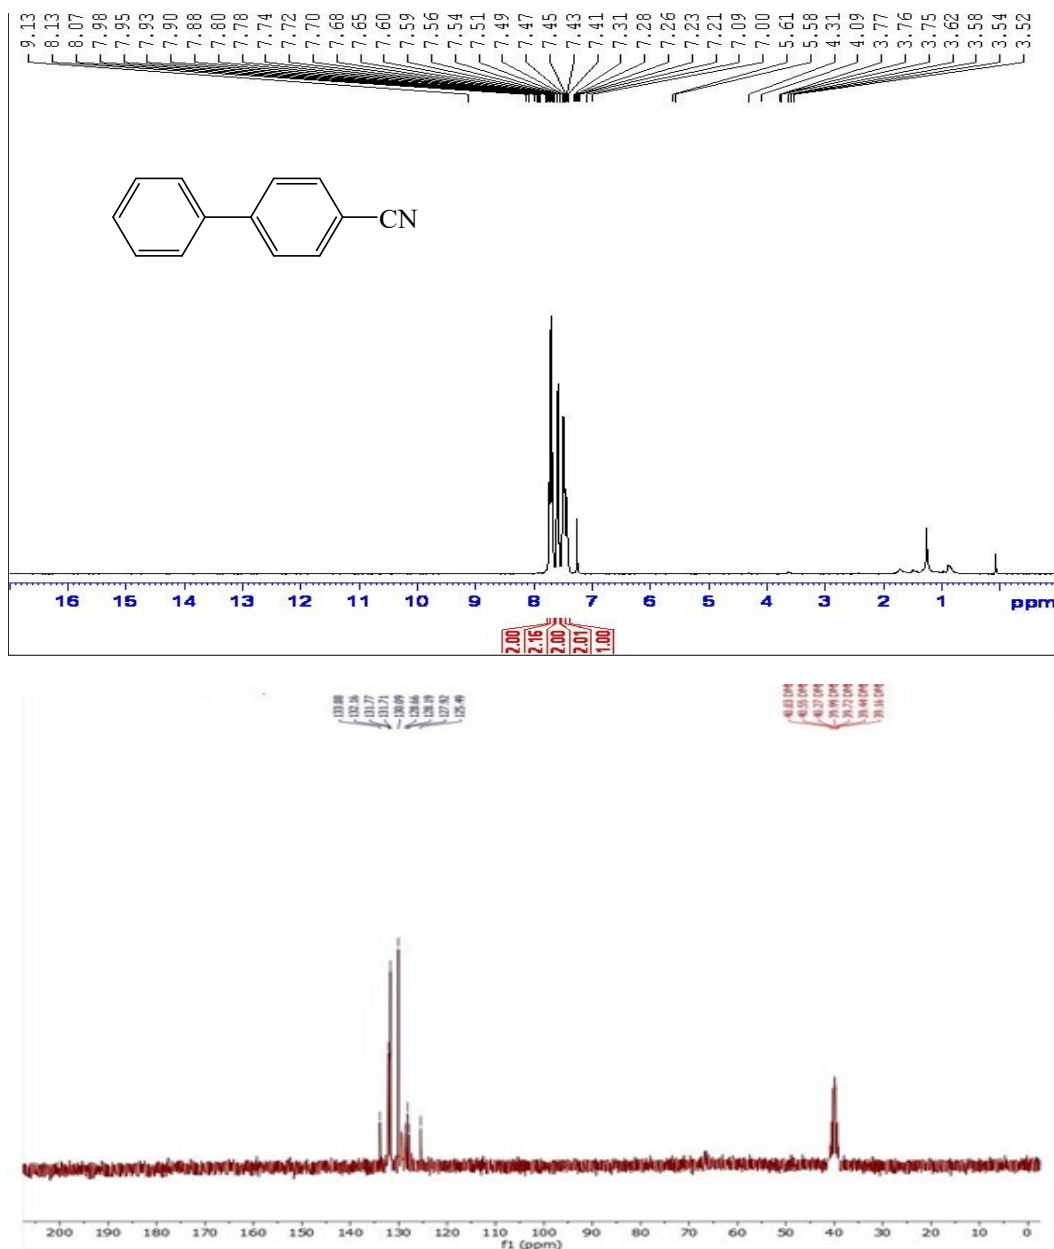

**Figure S33.** <sup>1</sup>H NMR and <sup>13</sup>C NMR spectra of 4-cyanobiphenyl

<sup>1</sup>H NMR (400 MHz, CDCl<sub>3</sub>): δ 7.68-7.74 (m, 4 H), 7.56-7.60 (m, 2 H), 7.41-7.51 (m, 3 H) ppm.

<sup>13</sup>C NMR (75 MHz, DMSO-d<sub>6</sub>), δ 133.8, 132.1, 131.7, 131.7, 130.0, 128.6, 128.1, 127.9, 125.4 ppm (Table 5, entries 8 and 12).

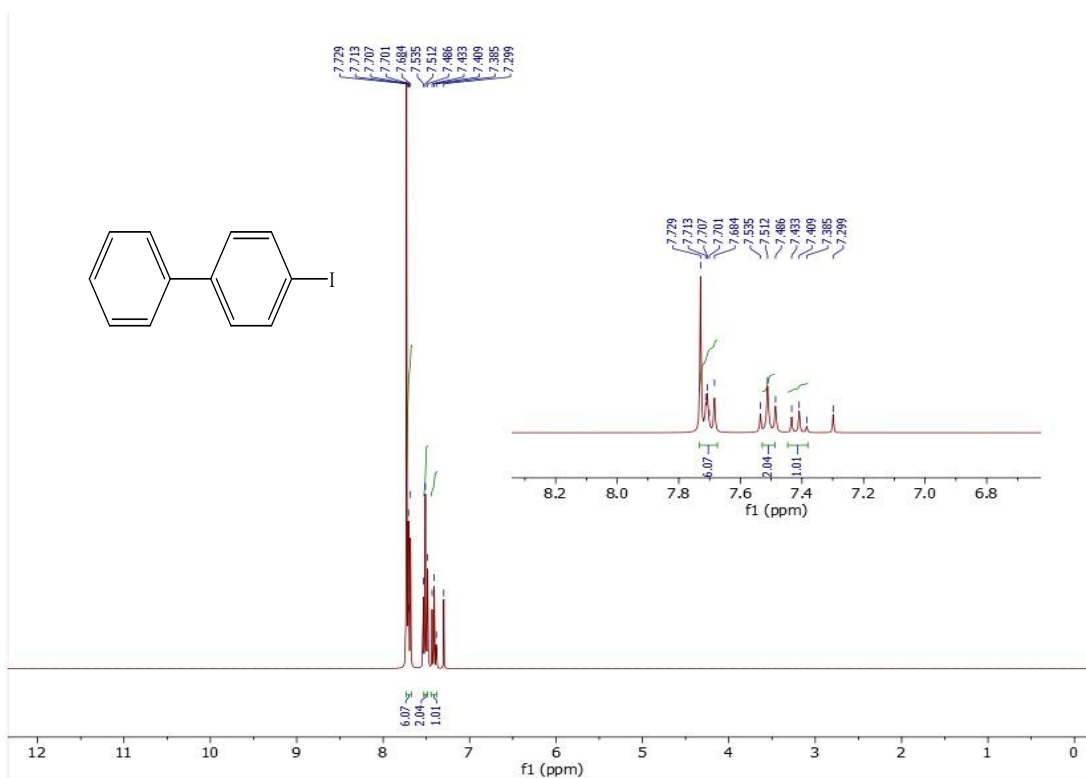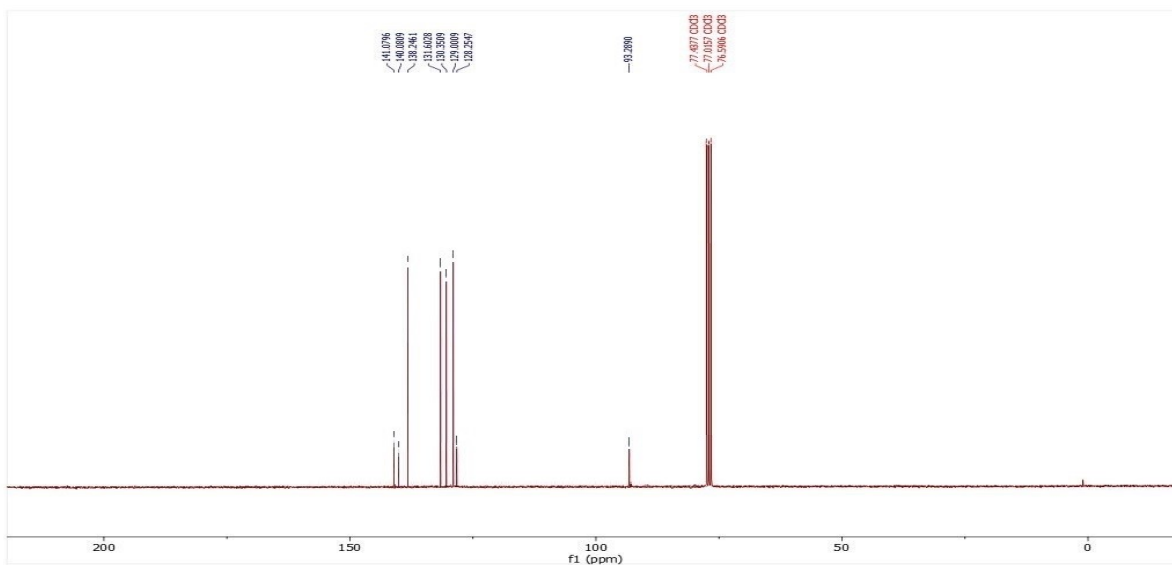

**Figure S34.**  $^1\text{H}$  NMR and  $^{13}\text{C}$  NMR spectra of 4-iodo-1, 1'-biphenyl

$^1\text{H}$  NMR (300 MHz,  $\text{CDCl}_3$ ):  $\delta$  7.67-7.73 (m, 6 H), 7.51 (t, 2 H,  $J = 7.8$  Hz), 7.40 (t, 1 H,  $J = 7.2$  Hz) ppm.  $^{13}\text{C}$  NMR (75 MHz,  $\text{CDCl}_3$ ),  $\delta$  141.0, 140.0, 138.2, 131.6, 130.3, 129.0, 128.2, 93.2 ppm (Table 5, entry 4).

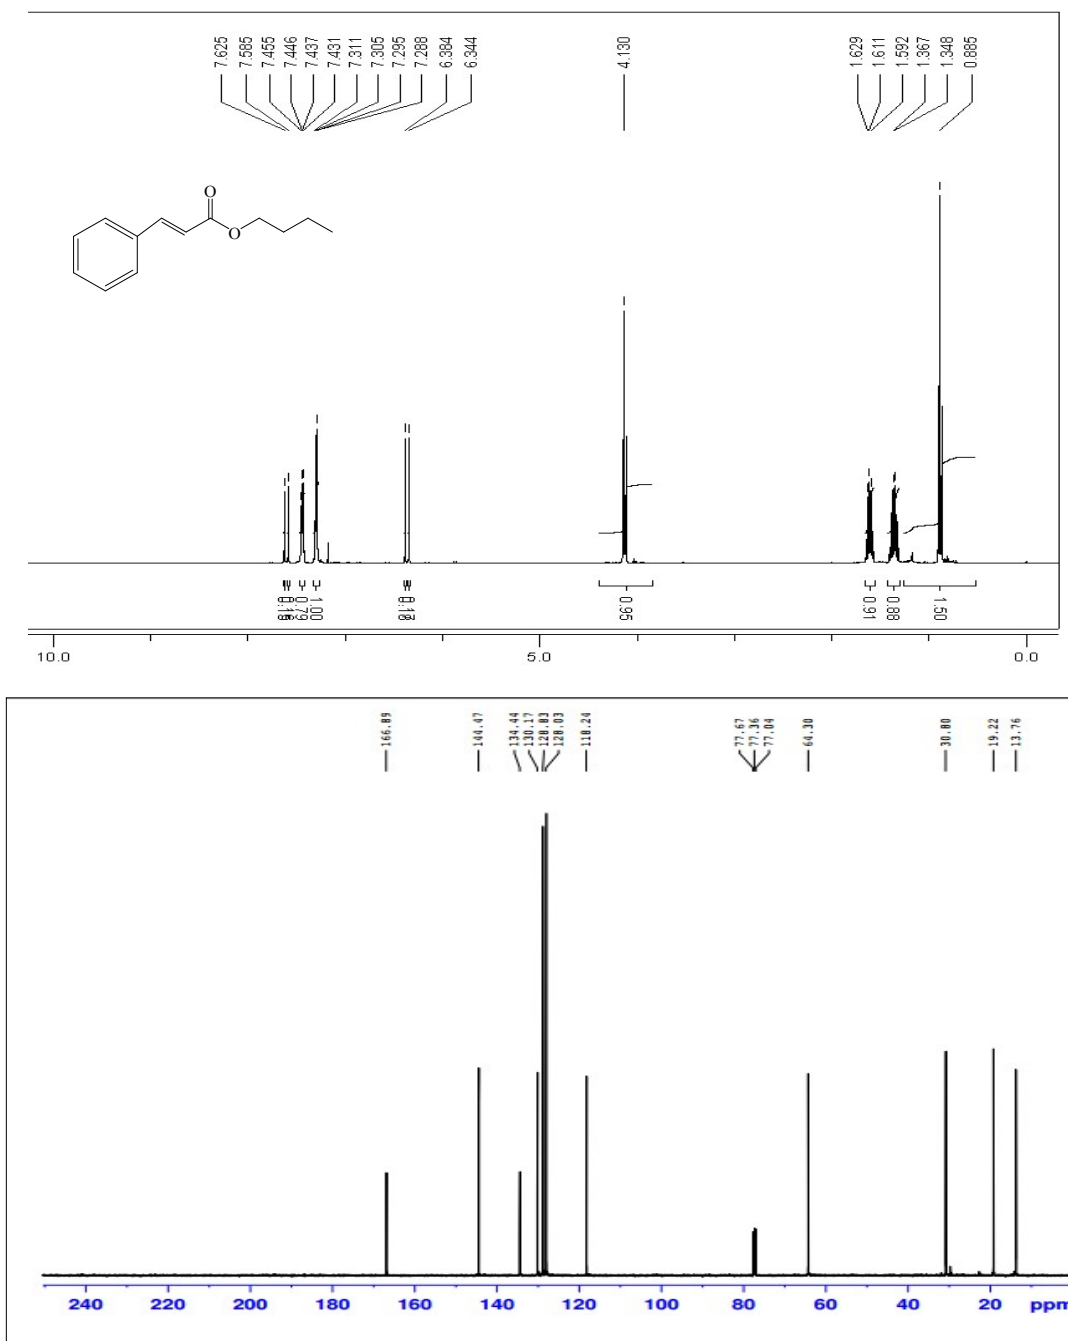

**Figure S35.**  $^1\text{H}$  NMR and  $^{13}\text{C}$  NMR spectra of (*E*)-*n*-butyl cinnamate

$^1\text{H}$  NMR (400 MHz,  $\text{CDCl}_3$ ):  $\delta$  7.60 (d, 1 H,  $J = 16.0$  Hz), 7.43-7.45 (m, 2 H), 7.29-7.30 (m, 3 H), 6.36 (d, 1 H,  $J = 16.0$  Hz), 4.13 (t, 2 H,  $J = 6.8$  Hz), 1.59-1.62 (m, 2 H), 1.34-1.36 (m, 2 H),  $\delta$  0.88 (t, 3 H,  $J = 7.6$  Hz) ppm.  $^{13}\text{C}$  NMR (100 MHz,  $\text{CDCl}_3$ ),  $\delta$  166.8, 144.4, 134.4, 130.1, 128.8, 128.0, 118.2, 64.3, 30.8, 19.2, 13.7 ppm (Table 6, entries 1, 7 and 10).

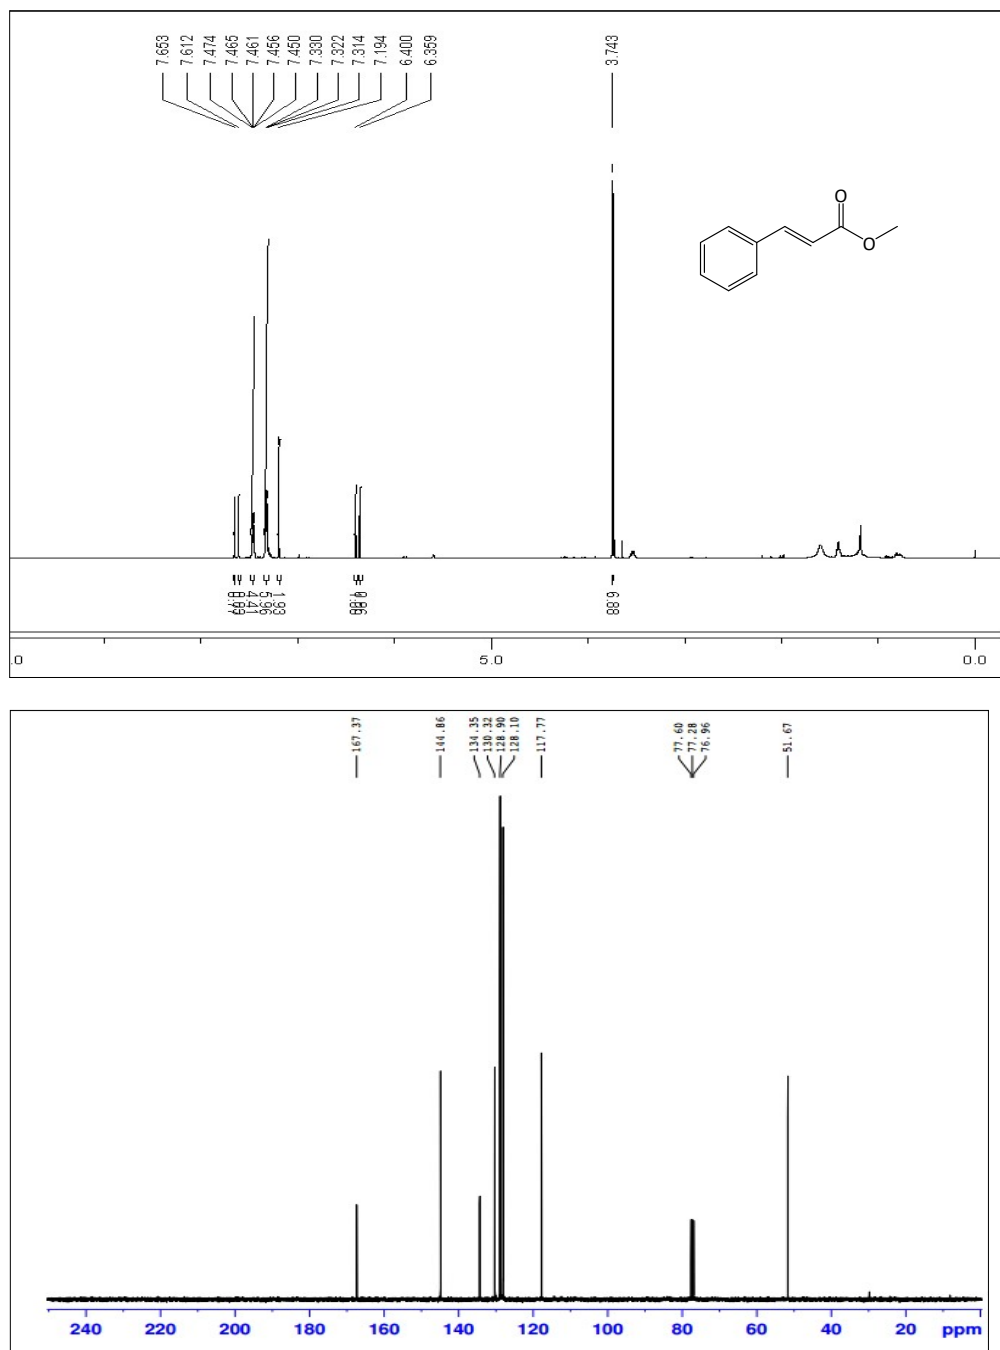

**Figure S36.**  $^1\text{H}$  NMR and  $^{13}\text{C}$  NMR spectra of (*E*)-methyl cinnamate

$^1\text{H}$  NMR (400 MHz,  $\text{CDCl}_3$ ):  $\delta$  7.63 (d, 1 H,  $J = 16.4$  Hz), 7.45-7.47 (m, 2 H), 7.31-7.33 (m, 3 H), 6.38 (d, 1 H,  $J = 16.4$  Hz), 3.74 (s, 3 H) ppm.  $^{13}\text{C}$  NMR (100 MHz,  $\text{CDCl}_3$ ),  $\delta$  167.3, 144.8, 134.3, 130.3, 128.9, 128.1, 117.7, 51.6 ppm (Table 6, entry 2).

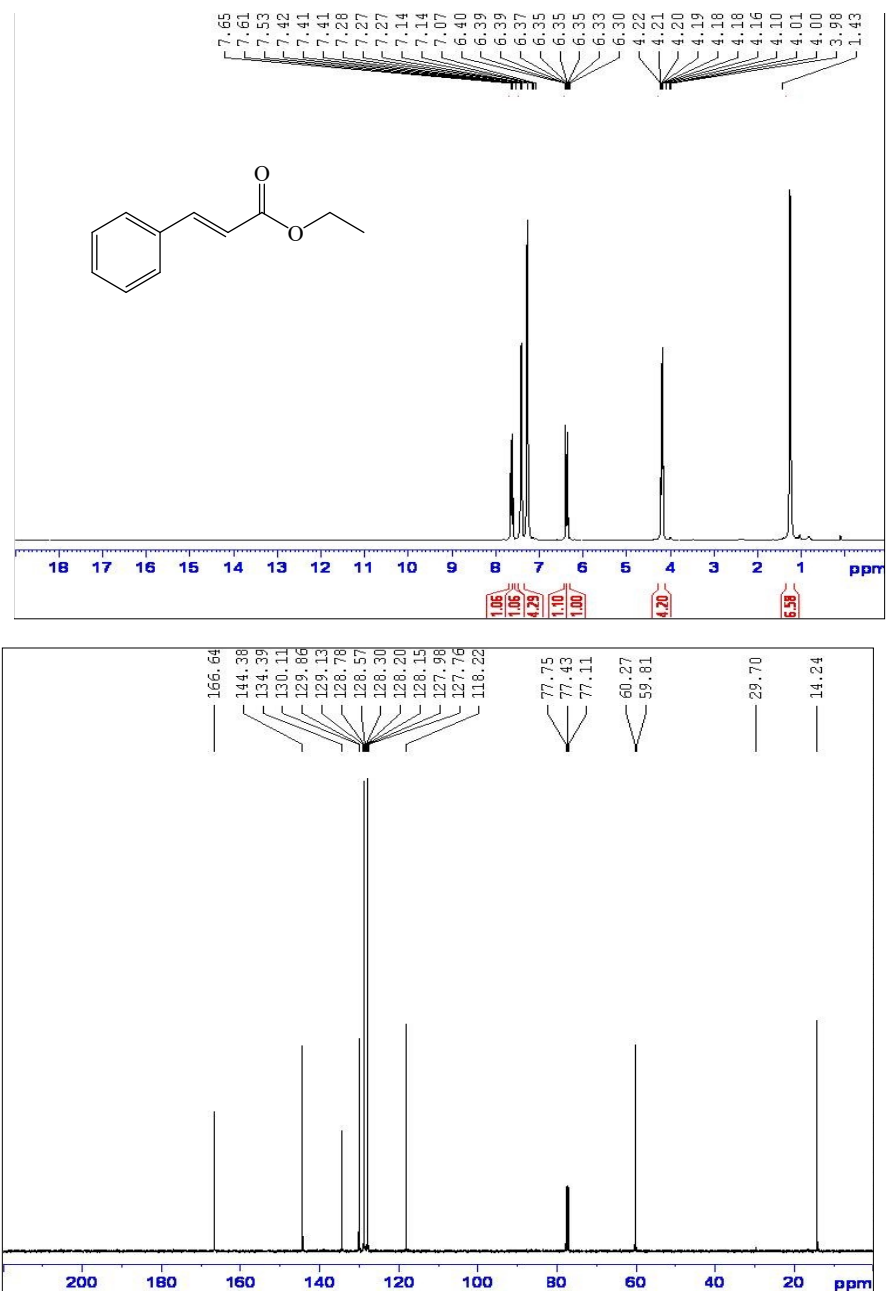

**Figure S37.** <sup>1</sup>H NMR and <sup>13</sup>C NMR spectra of (*E*)-ethyl cinnamate

<sup>1</sup>H NMR (400 MHz, CDCl<sub>3</sub>): δ 7.63 (d, 1 H, *J* = 16.0 Hz), 7.41-7.42 (m, 2 H), 7.27-7.28 (m, 3 H), 6.35 (d, 1 H, *J* = 16.0 Hz), 4.19 (q, 2 H, *J* = 8.0 Hz), 1.43 (t, 3 H, *J* = 8.0 Hz) ppm. <sup>13</sup>C NMR (100 MHz, CDCl<sub>3</sub>), δ 166.6, 144.3, 134.3, 130.1, 128.7, 127.9, 11.2, 60.0, 14.2 ppm (Table 6, entry 3).

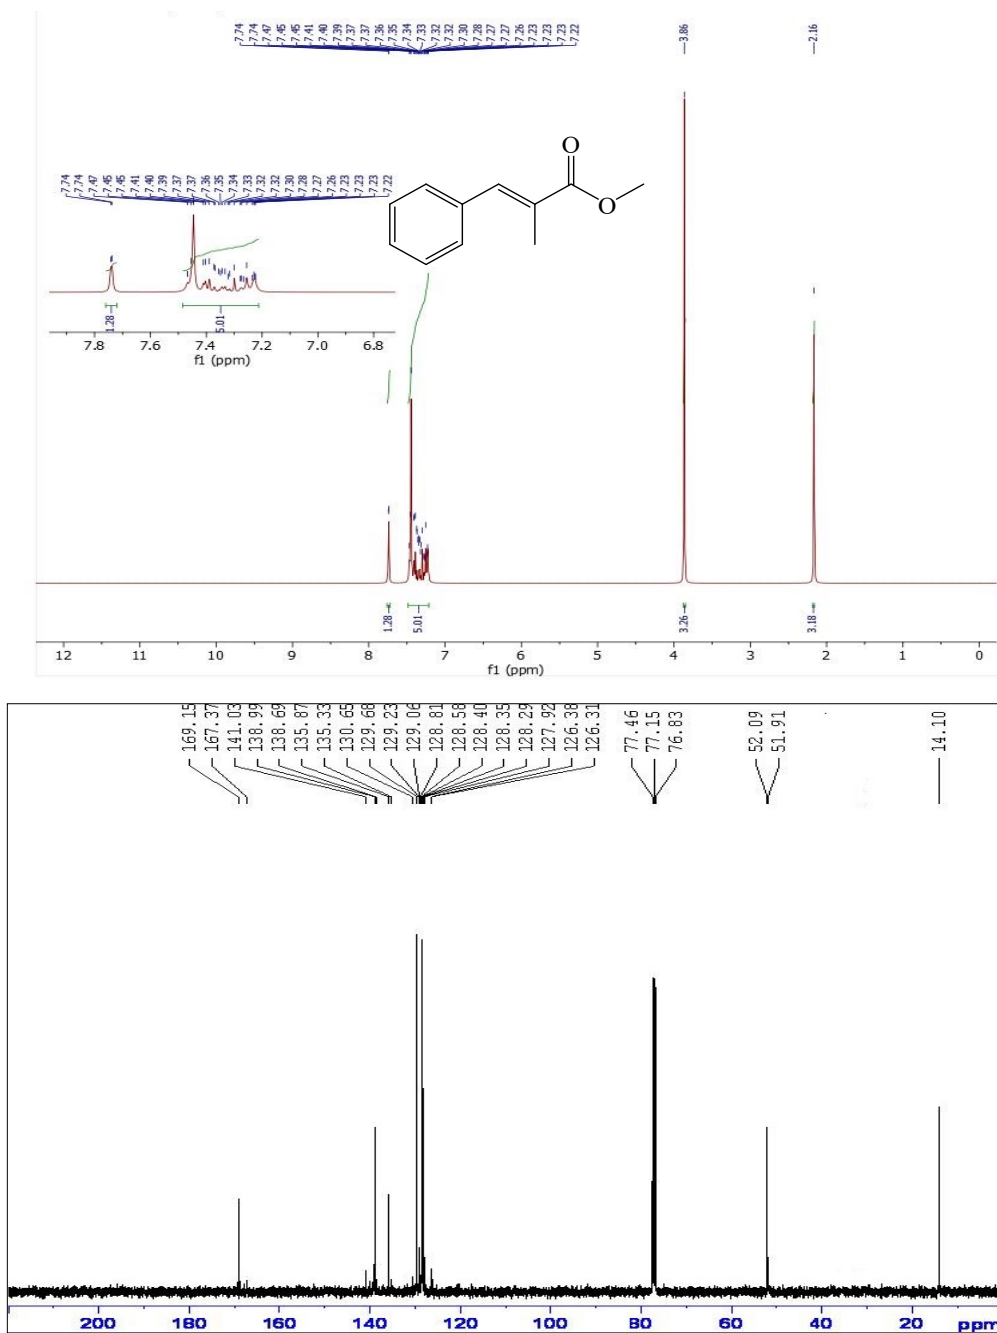

**Figure S38.**  $^1\text{H}$  NMR and  $^{13}\text{C}$  NMR spectra of (*E*)-methyl 2-methyl-3-phenylacrylate  
 $^1\text{H}$  NMR (300 MHz,  $\text{CDCl}_3$ ):  $\delta$  7.74 (s, 1 H), 7.22-7.47 (m, 5 H), 3.86 (s, 3 H), 2.16 (s, 3 H) ppm.  
 $^{13}\text{C}$  NMR (100 MHz,  $\text{CDCl}_3$ ),  $\delta$  169.1, 138.9, 135.8, 129.6, 127.9, 52.0, 14.1 ppm (Table 6, entry 4).



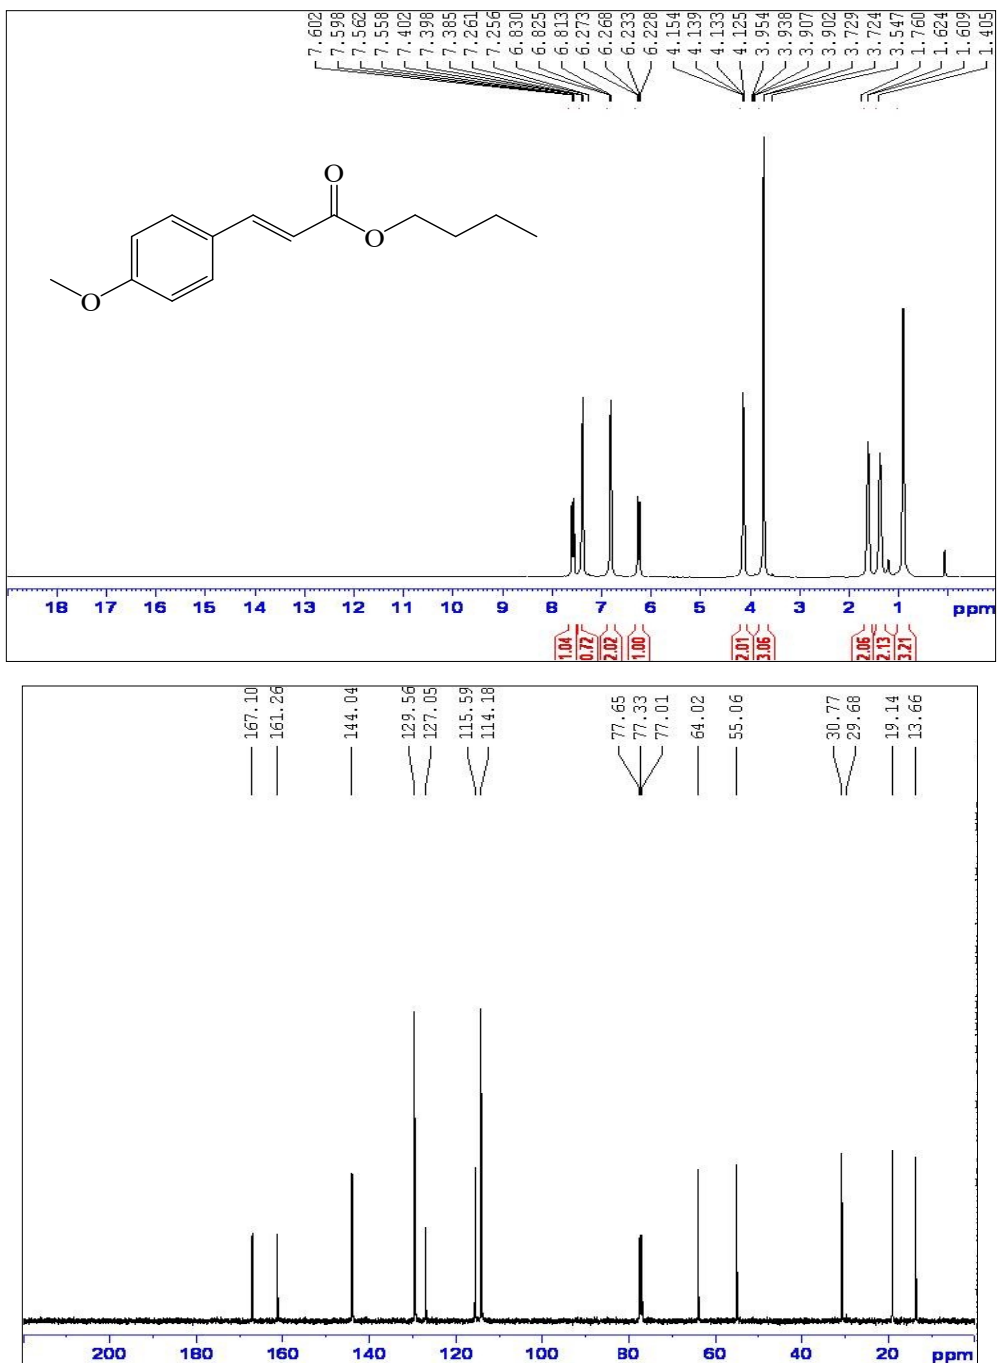

**Figure S39.** <sup>1</sup>H NMR and <sup>13</sup>C NMR spectra of *(E)*-*n*-butyl 3-(4-methoxyphenyl) acrylate <sup>1</sup>H NMR (400 MHz, CDCl<sub>3</sub>): δ 7.58 (d, 1 H, *J* = 16.0 Hz), 7.39 (d, 3 H, *J* = 4.2 Hz), 6.24 (d, 1 H, *J* = 16.0 Hz), 4.13 (m, 2 H, *J* = 7.0 Hz), 3.72 (s, 3 H), 1.60-1.62 (m, 2 H), 1.35-1.40 (m, 2 H), 0.91 (t, 3 H, *J* = 7.0 Hz) ppm. <sup>13</sup>C NMR (100 MHz, CDCl<sub>3</sub>), δ 167.1, 161.2, 144.0, 129.5, 127.0, 115.5, 114.1, 64.0, 55.0, 30.7, 19.1, 13.6 ppm (Table 6, entry 5).

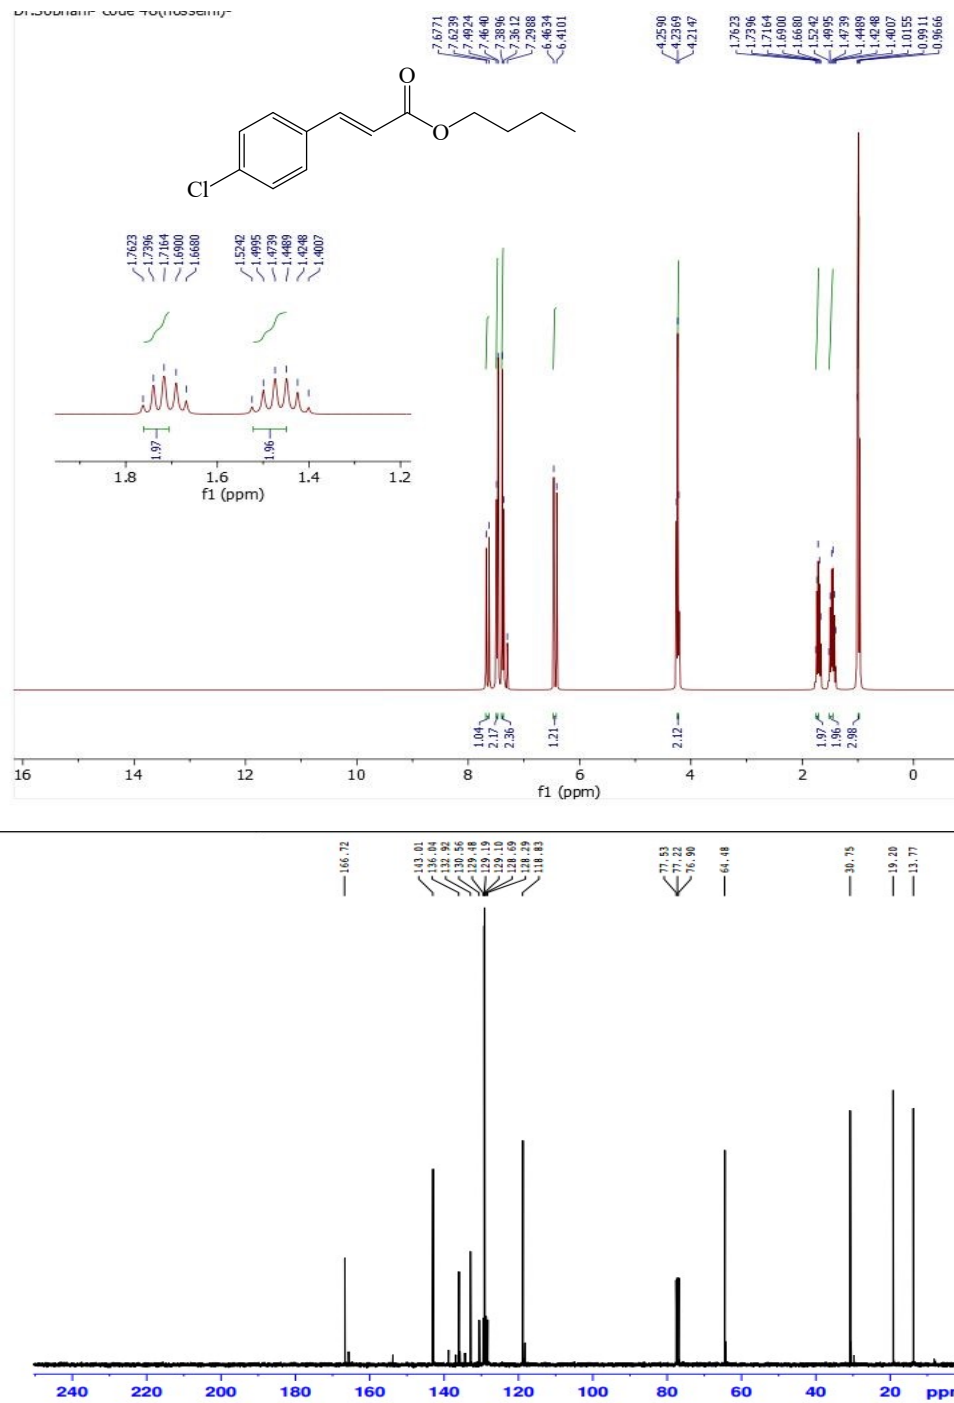

**Figure S40.** <sup>1</sup>H NMR and <sup>13</sup>C NMR spectra of (*E*)-*n*-butyl 3-(4-chlorophenyl) acrylate  
<sup>1</sup>H NMR (300 MHz, CDCl<sub>3</sub>): δ 7.65 (d, 1 H, *J* = 16.0 Hz), 7.47 (d, 2 H, *J* = 8.5 Hz), 7.37 (d, 2 H, *J* = 8.5 Hz), 6.43 (d, 1 H, *J* = 16.0 Hz), 4.24 (t, 2 H, *J* = 6.6 Hz), 1.40-1.52 (m, 2 H), 1.67-1.76 (m, 2 H), 0.99 (t, 3 H, *J* = 7.3 Hz) ppm. <sup>13</sup>C NMR (100 MHz, CDCl<sub>3</sub>), δ 166.7, 143.0, 136.0, 132.9, 129.4, 129.1, 118.8, 64.4, 30.7, 19.2, 13.7 ppm (Table 6, entry 6).

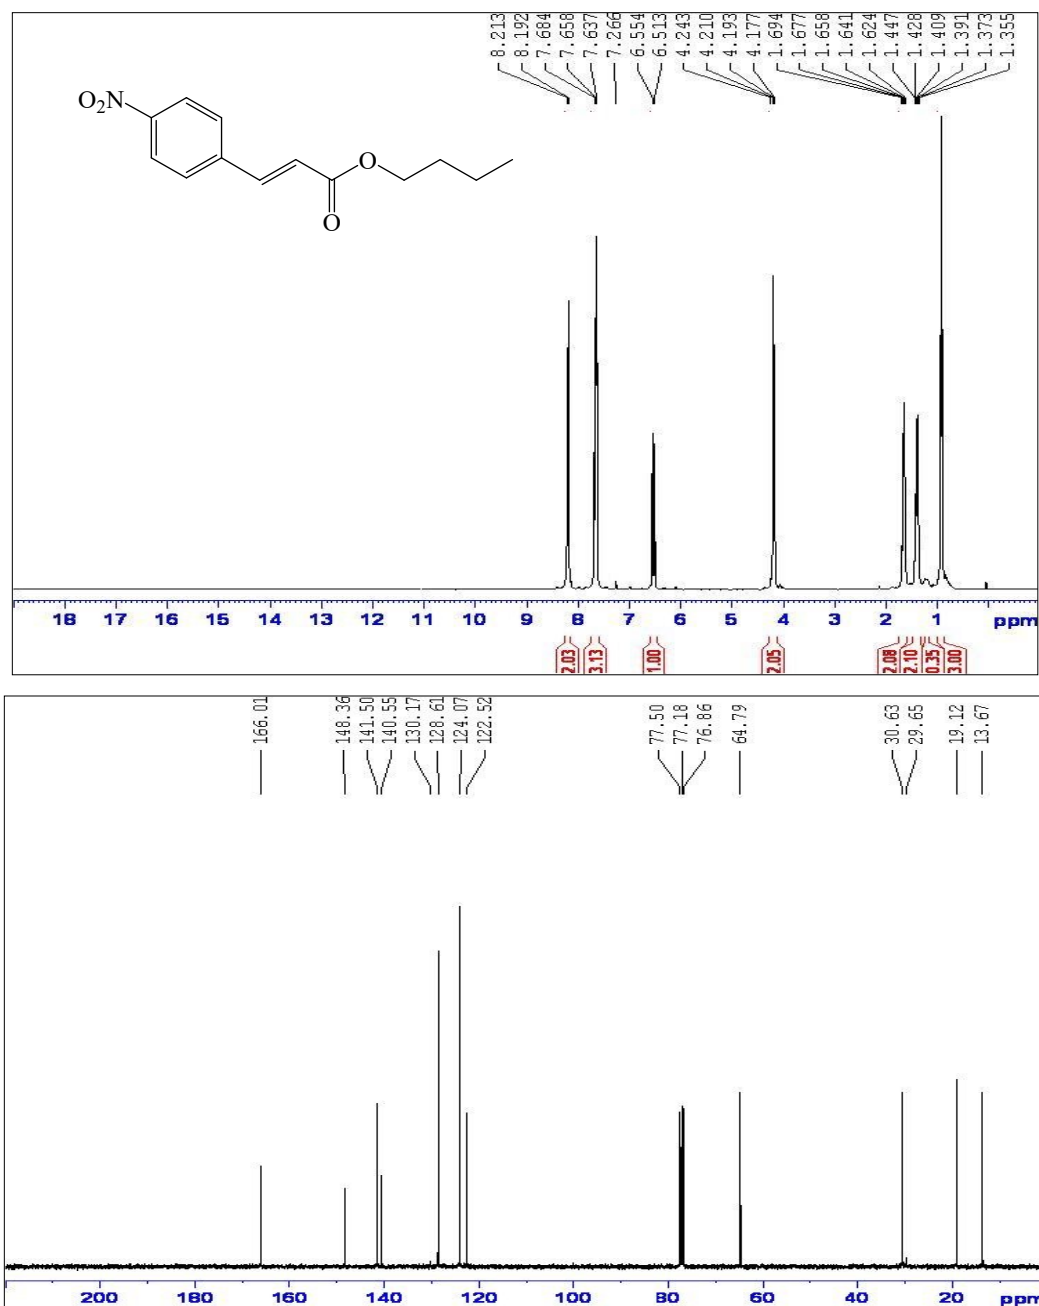

**Figure S41.** <sup>1</sup>H NMR and <sup>13</sup>C NMR spectra of *(E)*-*n*-butyl 3-(4-nitrophenyl) acrylate  
<sup>1</sup>H NMR (400 MHz, CDCl<sub>3</sub>): δ 8.20 (d, 2 H, *J* = 8.0 Hz), 7.63-7.68 (m, 3 H), 6.53 (d, 1 H, *J* = 16.0 Hz), 4.17-4.24 (m, 2 H), 1.62-1.69 (m, 2 H), 1.35-1.44 (m, 2 H), 0.92 (t, 3 H, *J* = 7.2 Hz) ppm. <sup>13</sup>C NMR (100 MHz, CDCl<sub>3</sub>), δ 166.0, 148.3, 141.5, 140.5, 128.6, 124.0, 122.5, 64.7, 30.6, 19.1, 13.6 ppm (Table 6, entries 8 and 11).

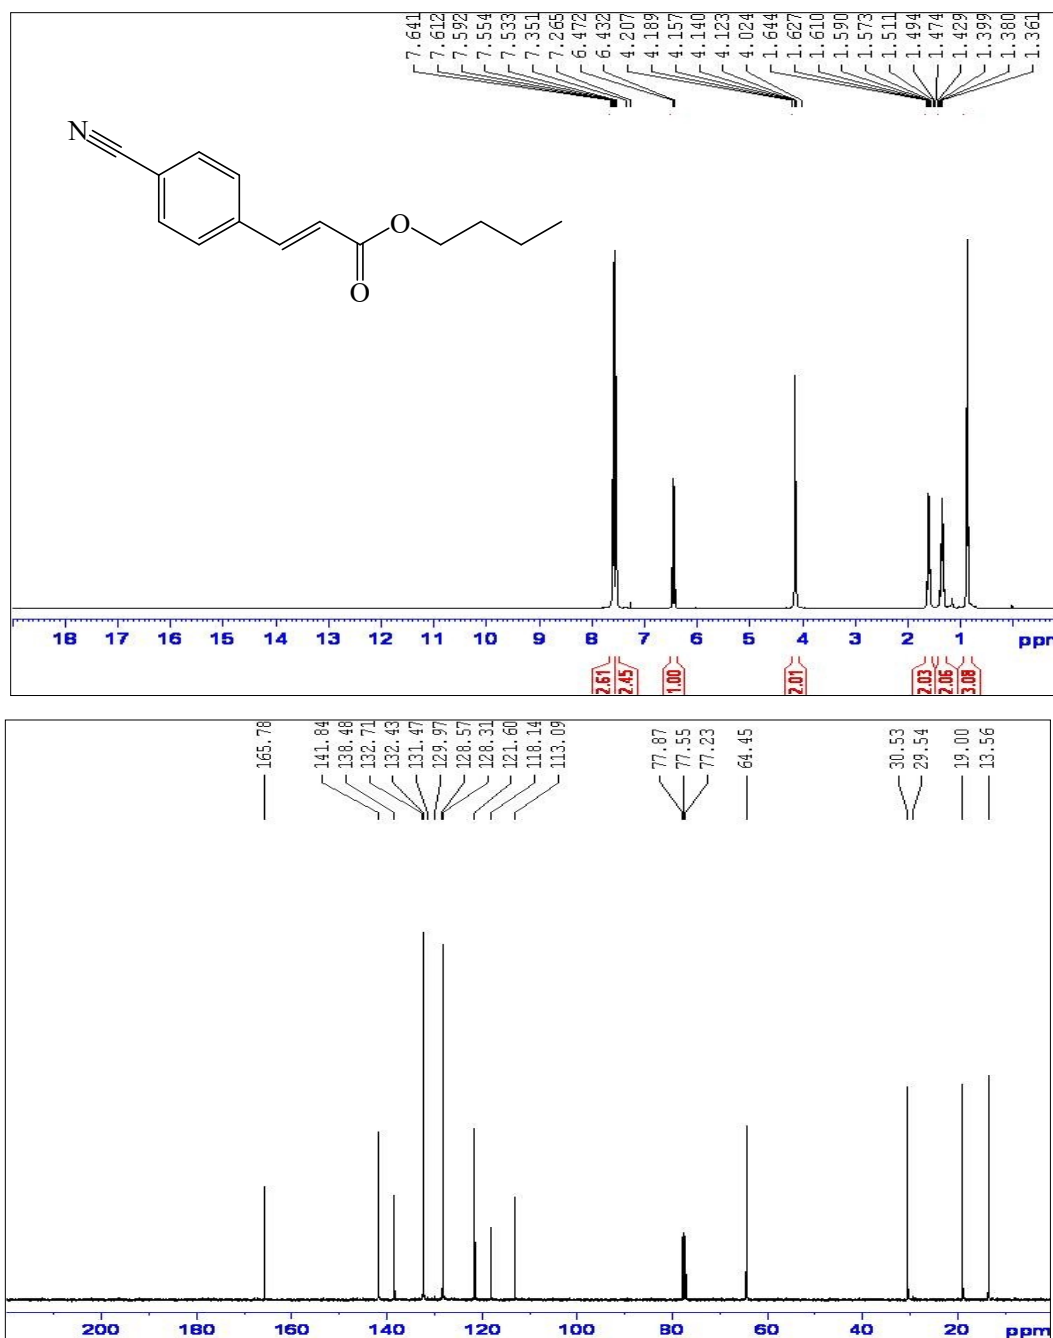

**Figure S42.**  $^1\text{H}$  NMR and  $^{13}\text{C}$  NMR spectra of (*E*)-*n*-butyl 3-(4-cyanophenyl) acrylate  
 $^1\text{H}$  NMR (400 MHz,  $\text{CDCl}_3$ ):  $\delta$  7.60 (d, 2 H,  $J = 8.0$  Hz), 7.57 (d, 1 H,  $J = 15.2$  Hz), 7.54 (d, 2 H,  $J = 8.4$  Hz), 6.45 (d, 1 H,  $J = 16.0$  Hz), 4.14 (t, 2 H,  $J = 6.8$  Hz), 1.57-1.64 (m, 2 H), 1.30-1.38 (m, 2 H), 0.77 (t, 3 H,  $J = 7.0$  Hz) ppm.  $^{13}\text{C}$  NMR (100 MHz,  $\text{CDCl}_3$ ),  $\delta$  165.7, 141.8, 138.4, 132.4, 128.3, 121.6, 118.1, 113.0, 64.4, 30.5, 19.0, 13.5 ppm (Table 6, entries 9 and 12).

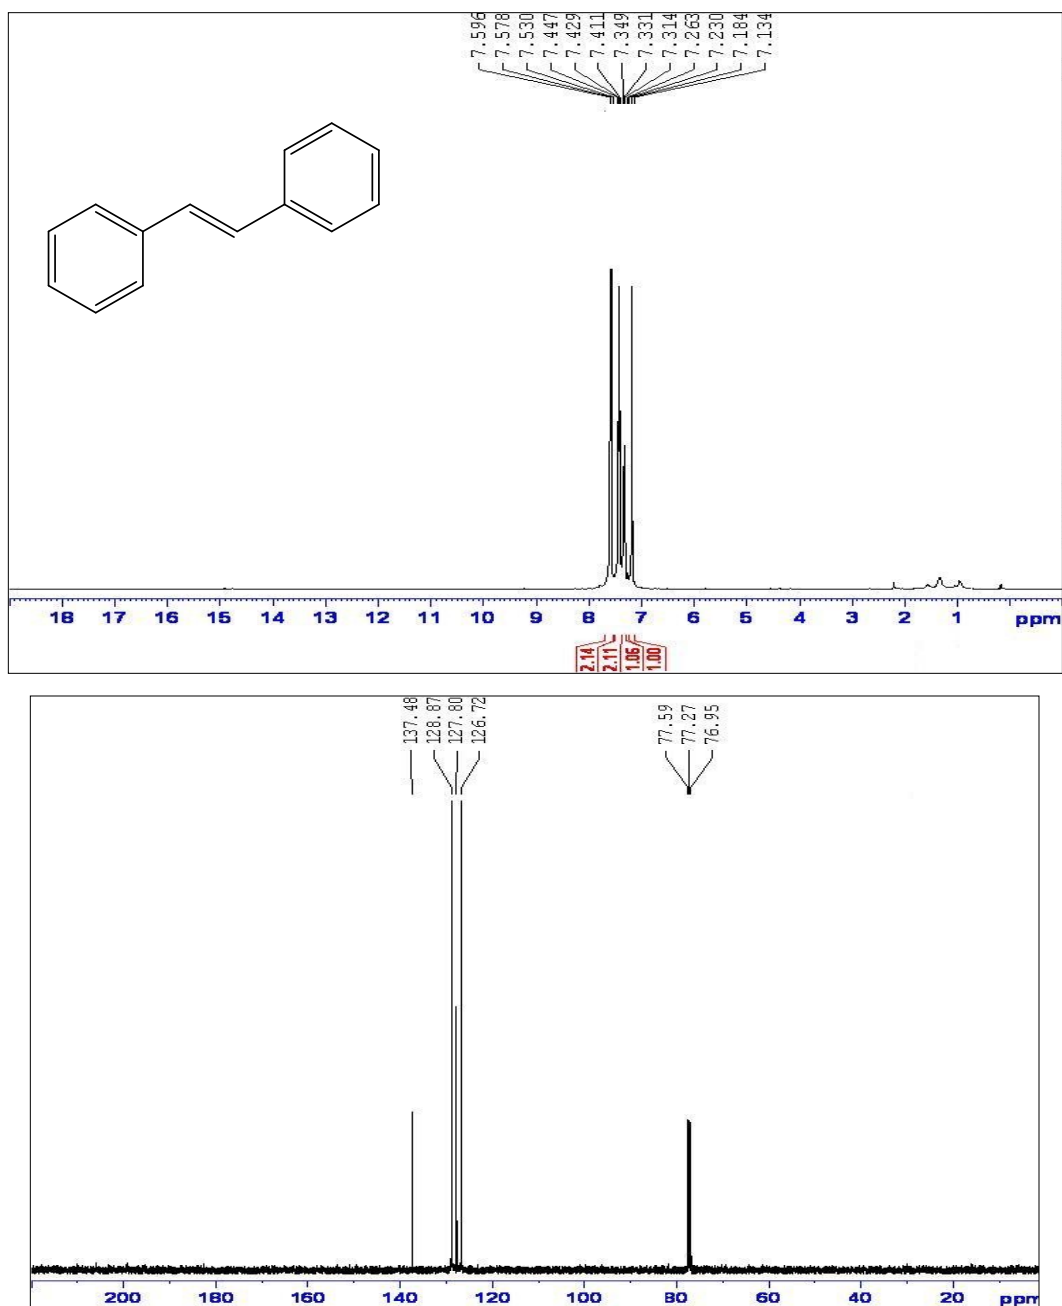

**Figure S43.** <sup>1</sup>H NMR and <sup>13</sup>C NMR spectra of (*E*)-1,2-diphenylethene

<sup>1</sup>H NMR (400 MHz, CDCl<sub>3</sub>): δ 7.58 (d, 4 H, *J* = 7.2 Hz), 7.42 (t, 4 H, *J* = 7.0 Hz), 7.33 (t, 2 H, *J* = 6.8 Hz), 7.18 (s, 2 H) ppm. <sup>13</sup>C NMR (100 MHz, CDCl<sub>3</sub>), δ 137.4, 128.8, 127.8, 126.7 ppm (Table 6, entries 13, 15 and 17).

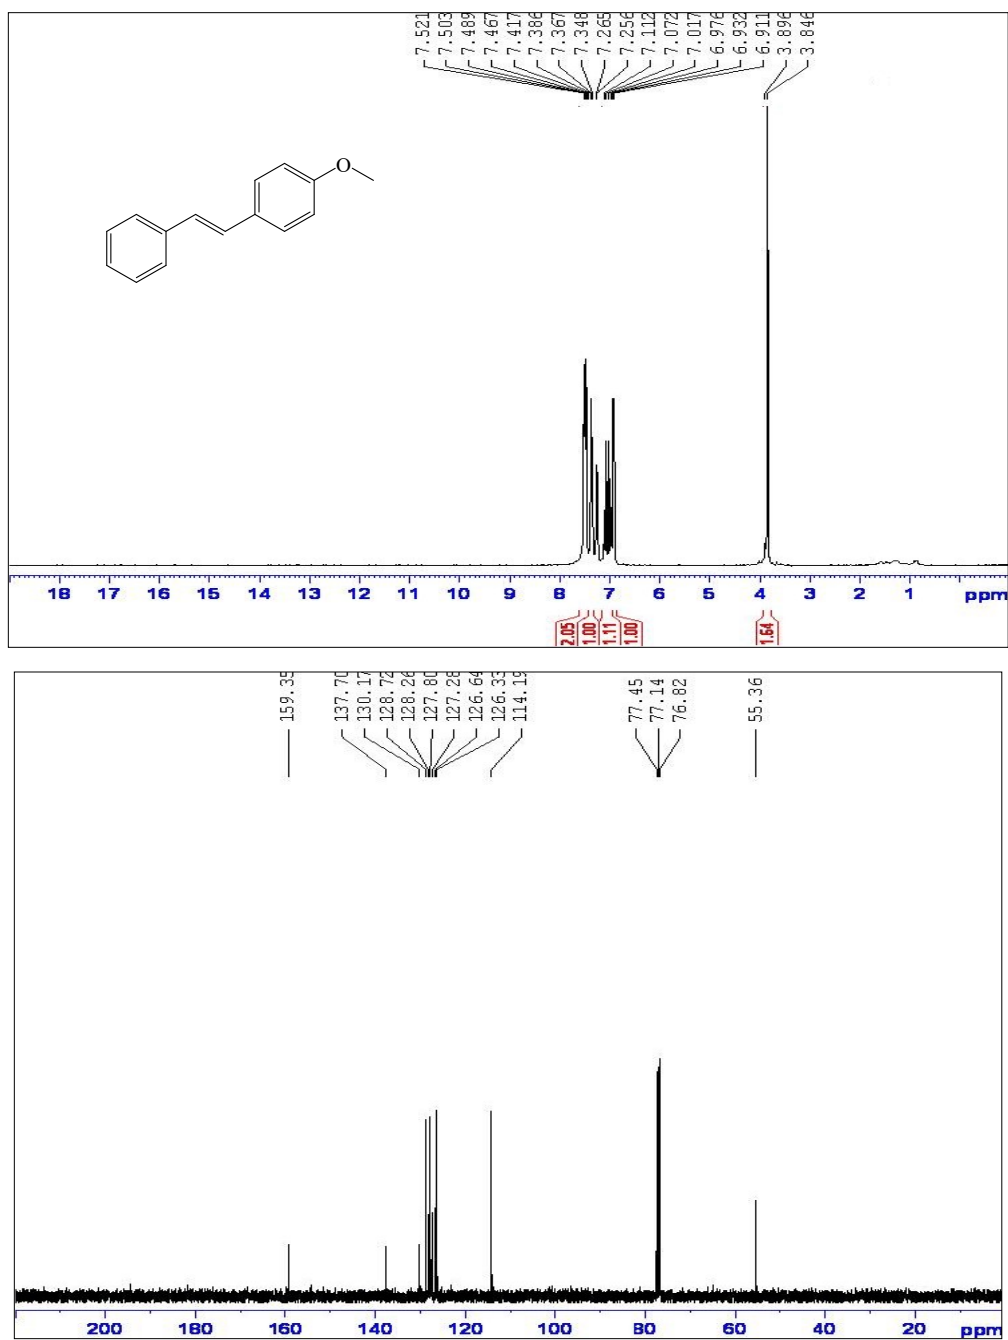

**Figure S44.** <sup>1</sup>H NMR and <sup>13</sup>C NMR spectra of (*E*)-1-methoxy-4-styrylbenzene

<sup>1</sup>H NMR (400 MHz, CDCl<sub>3</sub>): δ 7.46-7.52 (m, 3 H), 7.36 (t, 2 H, *J* = 7.6 Hz), 7.09 (d, 2 H, *J* = 16.0 Hz), 6.99 (d, 2 H, *J* = 16.4 Hz), 6.92 (d, 2 H, *J* = 8.4 Hz), 3.89 (s, 3 H) ppm. <sup>13</sup>C NMR (100 MHz, CDCl<sub>3</sub>), δ 159.3, 137.7, 130.1, 128.7, 128.2, 127.8, 127.2, 126.6, 126.3, 114.1, 55.3 ppm (Table 6, entry 14).

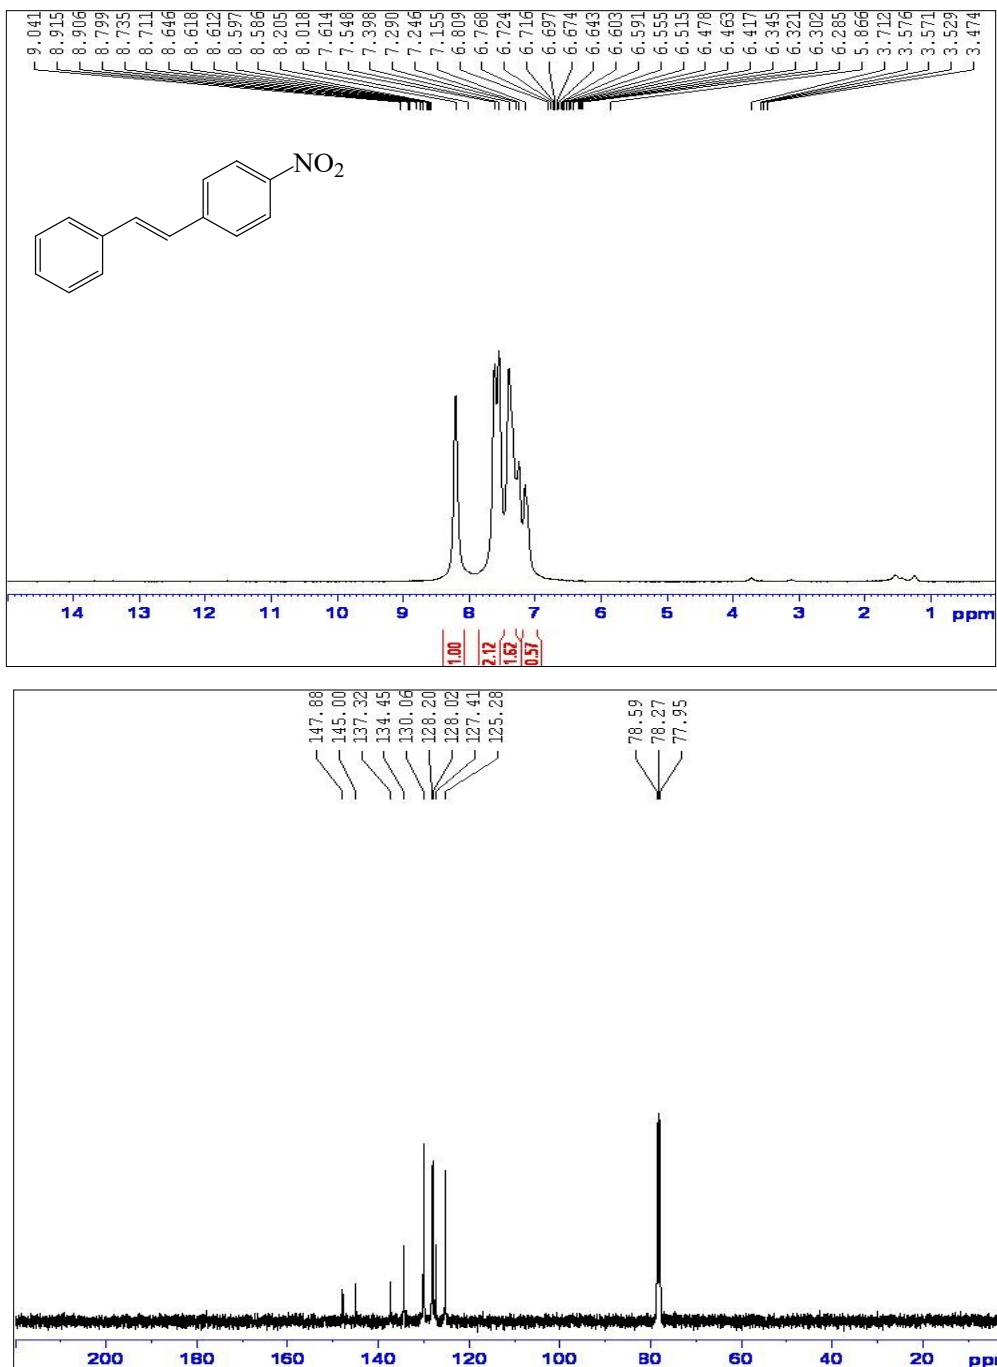

**Figure S45.** <sup>1</sup>H NMR and <sup>13</sup>C NMR spectra of (*E*)-1-nitro-4-styrylbenzene  
<sup>1</sup>H NMR (400 MHz, CDCl<sub>3</sub>): δ 8.15-8.26 (m, 2 H), 7.49-7.66 (m, 4 H), 7.40-7.45 (m, 4 H), 7.06-7.18 (m, 1 H) ppm. <sup>13</sup>C NMR (100 MHz, CDCl<sub>3</sub>), δ 147.8, 145.0, 137.3, 134.4, 130.0, 128.2, 128.0, 127.4, 125.2 ppm (Table 6, entry 16).
